# Supplementary material for: Cardiac miRNA Expression and their mRNA Targets in a Rat Model of Prediabetes
Source: MDPI journal article supplement (doi:10.3390/ijms21062128), 2020-03-20
Supplement: s1 [file s1]

| #  | GO Biological process                                                          | Expected count<br>Target gene symbol | Input count<br>Target gene name                                                                                                                               | Fold enrichment<br>Target node strength | FDR<br>Interacting miRNA list                                                                                                                                                                                                                                                                                                                                                                                       |
|----|--------------------------------------------------------------------------------|--------------------------------------|---------------------------------------------------------------------------------------------------------------------------------------------------------------|-----------------------------------------|---------------------------------------------------------------------------------------------------------------------------------------------------------------------------------------------------------------------------------------------------------------------------------------------------------------------------------------------------------------------------------------------------------------------|
| 1  | regulation of connective tissue replacement                                    | 0.12                                 | Rock2<br>Gata4<br>Klf6                                                                                                                                        | 3 25.55                                 | 5.41E-04<br>1 rno-miR-200c;<br>1 rno-miR-200c;<br>0 rno-miR-141.rno-miR-200a;                                                                                                                                                                                                                                                                                                                                       |
| 2  | blood vessel endothelial cell proliferation involved in sprouting angiogenesis | 0.14                                 | Vegfa<br>Sema5a<br>Epha2                                                                                                                                      | 3 21.90                                 | 7.62E-04<br>1 rno-miR-200c;<br>-1 rno-miR-293;<br>0 rno-miR-141.rno-miR-200a;                                                                                                                                                                                                                                                                                                                                       |
| 3  | regulation of lymphangiogenesis                                                | 0.14                                 | Vegfa<br>Vesl1<br>Epha2                                                                                                                                       | 3 21.90                                 | 7.62E-04<br>1 rno-miR-200c;<br>1 rno-miR-200c;<br>0 rno-miR-141.rno-miR-200a;                                                                                                                                                                                                                                                                                                                                       |
| 4  | exit from mitosis                                                              | 0.23                                 | Clasp1<br>Spast<br>Eps8                                                                                                                                       | 4 17.04                                 | 2.03E-04<br>1 rno-miR-200c;<br>-1 rno-miR-293;<br>1 rno-miR-200c;                                                                                                                                                                                                                                                                                                                                                   |
| 5  | regulation of extracellular matrix disassembly                                 | 0.27                                 | Clasp2<br>Clasp1<br>Ets1<br>Tgfb2                                                                                                                             | 4 14.60                                 | 3.31E-04<br>1 rno-miR-200c;<br>0 rno-miR-200c;mo-miR-208b-3p;<br>0 rno-miR-141.rno-miR-200a;<br>0 rno-miR-141.rno-miR-200a;                                                                                                                                                                                                                                                                                         |
| 6  | plasma membrane phospholipid scrambling                                        | 0.31                                 | Pls3<br>Xkr8<br>Xkr4<br>Ano6                                                                                                                                  | 4 12.78                                 | 5.08E-04<br>1 rno-miR-200c;<br>1 rno-miR-200c;<br>1 rno-miR-200c;<br>0 rno-miR-141.rno-miR-200a;                                                                                                                                                                                                                                                                                                                    |
| 7  | negative regulation of morphogenesis of an epithelium                          | 0.35                                 | Clasp1<br>Sulf1<br>Nkd1<br>Clasp2                                                                                                                             | 4 11.36                                 | 7.44E-04<br>1 rno-miR-200c;<br>1 rno-miR-200c;<br>0 rno-miR-141.rno-miR-200a;<br>0 rno-miR-141.rno-miR-200a;                                                                                                                                                                                                                                                                                                        |
| 8  | heart valve development                                                        | 1.10                                 | Robo2<br>Slit2<br>Prdm1<br>Mdm4<br>Gata4<br>Matr3<br>Tgfb2<br>Pitx2                                                                                           | 8 7.30                                  | 2.98E-05<br>1 rno-miR-200c;<br>1 rno-miR-200c;<br>1 rno-miR-200c;<br>1 rno-miR-200c;<br>1 rno-miR-200c;<br>1 rno-miR-200c;<br>0 rno-miR-141.rno-miR-200a;<br>0 rno-miR-141.rno-miR-200a;                                                                                                                                                                                                                            |
| 9  | ventricular septum morphogenesis                                               | 0.84                                 | Robo2<br>Slit2<br>Cited2<br>Zfp2<br>Tgfb2<br>Pitx2                                                                                                            | 6 7.13                                  | 3.35E-04<br>1 rno-miR-200c;<br>1 rno-miR-200c;<br>1 rno-miR-200c;<br>1 rno-miR-200c;<br>0 rno-miR-141.rno-miR-200a;<br>0 rno-miR-141.rno-miR-200a;                                                                                                                                                                                                                                                                  |
| 10 | regulation of protein autophosphorylation                                      | 0.92                                 | Rap2c<br>Vegfa<br>Erff1<br>Nrq1<br>Jun<br>Cnp1                                                                                                                | 6 6.52                                  | 5.16E-04<br>1 rno-miR-141.rno-miR-200a;mo-miR-200c;<br>1 rno-miR-200c;<br>1 rno-miR-200c;<br>1 rno-miR-200c;<br>1 rno-miR-200c;<br>0 rno-miR-141.rno-miR-200a;                                                                                                                                                                                                                                                      |
| 11 | positive regulation of dendritic spine development                             | 1.21                                 | Lpar1<br>Nrq1<br>Marcks<br>Mim4<br>Nr3c1<br>Cpeb3<br>Tiam1                                                                                                    | 7 5.77                                  | 5.33E-04<br>1 rno-miR-200c;<br>1 rno-miR-200c;<br>1 rno-miR-200c;<br>-1 rno-miR-293;<br>1 rno-miR-141.rno-miR-200a;mo-miR-200c;<br>0 rno-miR-141.rno-miR-200a;<br>0 rno-miR-141.rno-miR-200a;                                                                                                                                                                                                                       |
| 12 | outflow tract morphogenesis                                                    | 1.51                                 | Robo2<br>Cited2<br>Zfp2<br>Vegfa<br>Tfap2a<br>Jun<br>Tgfb2<br>Pitx2                                                                                           | 8 5.31                                  | 2.28E-04<br>1 rno-miR-200c;<br>1 rno-miR-200c;<br>1 rno-miR-200c;<br>1 rno-miR-200c;<br>1 rno-miR-200c;<br>1 rno-miR-200c;<br>0 rno-miR-141.rno-miR-200a;<br>0 rno-miR-141.rno-miR-200a;                                                                                                                                                                                                                            |
| 13 | regulation of protein depolymerization                                         | 1.70                                 | Clasp1<br>Tpm1<br>Sema5a<br>Spast<br>Eps8<br>Tmc3<br>Tbb2<br>Clasp2                                                                                           | 8 4.70                                  | 4.88E-04<br>1 rno-miR-200c;<br>-1 rno-miR-293;<br>-1 rno-miR-293;<br>-1 rno-miR-293;<br>1 rno-miR-200c;<br>1 rno-miR-200c;<br>0 rno-miR-141.rno-miR-200a;<br>0 rno-miR-141.rno-miR-200a;                                                                                                                                                                                                                            |
| 14 | positive regulation of axonogenesis                                            | 2.00                                 | Robo2<br>Vegfa<br>Dlx1<br>Sema5a<br>Nrq1<br>Slitk1<br>Fn1<br>Tiam1<br>Zeb2<br>4.68                                                                            | 9 4.51                                  | 2.92E-04<br>1 rno-miR-200c;<br>1 rno-miR-200c;<br>-1 rno-miR-293;<br>-1 rno-miR-293;<br>1 rno-miR-200c;<br>1 rno-miR-200c;<br>1 rno-miR-200c;<br>0 rno-miR-141.rno-miR-200a;<br>0 rno-miR-200a;mo-miR-200c;<br>2.66E-06                                                                                                                                                                                             |
| 15 | lung development                                                               | 2.76                                 | Zfp2<br>Mycn<br>Vegfa<br>Tmem38b<br>Pkl1<br>Pbx7<br>Dspo<br>Gata4<br>Erff1<br>Slc23a1<br>Nr3c1<br>Pdgfra<br>Tshz3<br>Thrb<br>Sim2<br>Ptges3<br>Tgfb2<br>Pitx2 | 18 3.85                                 | 1 rno-miR-200c;<br>-1 rno-miR-293;<br>1 rno-miR-200c;<br>1 rno-miR-200c;<br>1 rno-miR-200c;<br>1 rno-miR-200c;<br>1 rno-miR-200c;<br>1 rno-miR-200c;<br>1 rno-miR-200c;<br>1 rno-miR-200c;<br>1 rno-miR-200c;<br>1 rno-miR-141.rno-miR-200a;mo-miR-200c;<br>0 rno-miR-141.rno-miR-200a;<br>0 rno-miR-141.rno-miR-200a;<br>0 rno-miR-141.rno-miR-200a;<br>0 rno-miR-141.rno-miR-200a;<br>0 rno-miR-141.rno-miR-200a; |
| 16 | regulation of cell shape                                                       | 2.72                                 | Lpar1<br>Vegfa<br>Tpm1<br>Eps8<br>Shroom3<br>Fn1<br>Thrb<br>Syne3<br>Myh10<br>Sept7                                                                           | 10 3.68                                 | 6.23E-04<br>1 rno-miR-200c;<br>1 rno-miR-200c;<br>-1 rno-miR-293;<br>1 rno-miR-200c;<br>-1 rno-miR-293;<br>1 rno-miR-200c;<br>0 rno-miR-141.rno-miR-200a;<br>0 rno-miR-141.rno-miR-200a;<br>0 rno-miR-141.rno-miR-200a;<br>0 rno-miR-141.rno-miR-200a;                                                                                                                                                              |
| 17 | development of primary female sexual characteristics                           | 2.76                                 | Robo2<br>Slit2<br>Vegfa<br>Acvr1b<br>Nup107<br>Emp1<br>Acshb1<br>Znf830<br>Pdgfra<br>Pitx2                                                                    | 10 3.62                                 | 6.91E-04<br>1 rno-miR-200c;<br>1 rno-miR-200c;<br>1 rno-miR-200c;<br>-1 rno-miR-293;<br>1 rno-miR-200c;<br>1 rno-miR-200c;<br>1 rno-miR-200c;<br>-1 rno-miR-293;<br>0 rno-miR-141.rno-miR-200a;<br>0 rno-miR-141.rno-miR-200a;                                                                                                                                                                                      |
| 18 | positive regulation of epithelial cell migration                               | 2.80                                 | Robo2<br>Slit2<br>Vegfa<br>Acvr1b<br>Nup107<br>Emp1<br>Acshb1<br>Znf830<br>Pdgfra<br>Pitx2                                                                    | 10 3.57                                 | 7.65E-04<br>1 rno-miR-200c;<br>1 rno-miR-200c;<br>1 rno-miR-200c;<br>-1 rno-miR-293;<br>1 rno-miR-200c;<br>1 rno-miR-200c;<br>1 rno-miR-200c;<br>-1 rno-miR-293;<br>0 rno-miR-141.rno-miR-200a;<br>0 rno-miR-141.rno-miR-200a;                                                                                                                                                                                      |

|    |                                             |         |                                                                                   |    |      |          |                                     |
|----|---------------------------------------------|---------|-----------------------------------------------------------------------------------|----|------|----------|-------------------------------------|
|    |                                             | Rock2   | Rho-associated protein kinase 2                                                   |    |      | 1        | mo-miR-200c;                        |
|    |                                             | Clasp1  | Cytosolic linker-associated protein 1                                             |    |      | 1        | mo-miR-200c;                        |
|    |                                             | Vegfa   | Vascular endothelial growth factor A                                              |    |      | 1        | mo-miR-200c;                        |
|    |                                             | Sema5a  | Semaphorin-5A                                                                     |    |      | -1       | mo-miR-293;                         |
|    |                                             | Ppap2b  | Phospholipid phosphatase 3                                                        |    |      | 1        | mo-miR-200c;                        |
|    |                                             | Jun     | Transcription factor AP-1                                                         |    |      | 1        | mo-miR-200c;                        |
|    |                                             | Amot    | Anjakomtin                                                                        |    |      | 1        | mo-miR-141;                         |
|    |                                             | Ets1    | Protein C-ets-1                                                                   |    |      | 0        | mo-miR-200c;mo-miR-208b-3p;         |
|    |                                             | Tgfb2   | Transforming growth factor beta-2                                                 |    |      | 0        | mo-miR-141;mo-miR-200a;             |
|    |                                             | Clasp2  | CLIP-associating protein 2                                                        |    |      | 0        | mo-miR-141;mo-miR-200a;             |
| 19 | axon guidance                               | 3.95    |                                                                                   | 14 | 3.54 | 7.93E-05 |                                     |
|    |                                             | Robo2   | Roundabout guidance receptor 2                                                    |    |      | 1        | mo-miR-200c;                        |
|    |                                             | Slit2   | Slit homolog 2 protein (Fragment)                                                 |    |      | 1        | mo-miR-200c;                        |
|    |                                             | Vegfa   | Vascular endothelial growth factor A                                              |    |      | 1        | mo-miR-200c;                        |
|    |                                             | Sema5a  | Semaphorin-5A                                                                     |    |      | -1       | mo-miR-293;                         |
|    |                                             | Chn1    | N-chimaerin                                                                       |    |      | 1        | mo-miR-200c;                        |
|    |                                             | Etv1    | Ets variant 1                                                                     |    |      | -1       | mo-miR-293;                         |
|    |                                             | Aplbb2  | Amyloid beta precursor protein-binding family B member 2                          |    |      | 0        | mo-miR-141;mo-miR-200a;             |
|    |                                             | Nfasc   | Neurofascin                                                                       |    |      | 0        | mo-miR-141;mo-miR-200a;             |
|    |                                             | Unc5c   | Netrin receptor UNC5C                                                             |    |      | 0        | mo-miR-141;mo-miR-200a;             |
|    |                                             | Nrcam   | Neuronal cell adhesion molecule                                                   |    |      | 0        | mo-miR-141;mo-miR-200a;             |
|    |                                             | Nptn    | Neuroplastin                                                                      |    |      | 0        | mo-miR-141;mo-miR-200a;             |
|    |                                             | Mvh10   | Myosin-10                                                                         |    |      | 0        | mo-miR-141;mo-miR-200a;             |
|    |                                             | Tgfb2   | Transforming growth factor beta-2                                                 |    |      | 0        | mo-miR-141;mo-miR-200a;             |
|    |                                             | Epha2   | Eph receptor A2                                                                   |    |      | 0        | mo-miR-141;mo-miR-200a;             |
| 20 | embryonic limb morphogenesis                | 2.84    |                                                                                   | 10 | 3.52 | 8.46E-04 |                                     |
|    |                                             | Myzn    | N-myc proto-oncogene protein                                                      |    |      | -1       | mo-miR-293;                         |
|    |                                             | Lrp4    | Low-density lipoprotein receptor-related protein 4                                |    |      | 1        | mo-miR-200c;                        |
|    |                                             | Tlap2a  | Transcription factor AP-2-alpha                                                   |    |      | 1        | mo-miR-200c;                        |
|    |                                             | Cacna1c | Voltage-dependent L-type calcium channel subunit alpha-1C                         |    |      | 1        | mo-miR-200c;                        |
|    |                                             | Tp63    | Tumor protein 63                                                                  |    |      | -1       | mo-miR-293;                         |
|    |                                             | Reck    | RCG54895, isoform CRA_a                                                           |    |      | 1        | mo-miR-200c;                        |
|    |                                             | Tba2    | Tau tubulin kinase 2                                                              |    |      | 0        | mo-miR-141;mo-miR-200a;             |
|    |                                             | Tgfb2   | Transforming growth factor beta-2                                                 |    |      | 0        | mo-miR-141;mo-miR-200a;             |
|    |                                             | Pitx2   | Pituitary homeobox 2                                                              |    |      | 0        | mo-miR-141;mo-miR-200a;             |
|    |                                             | Cyp26b1 | Cytochrome P450 26B1                                                              |    |      | 0        | mo-miR-141;mo-miR-200a;             |
| 21 | stem cell differentiation                   | 3.21    |                                                                                   | 11 | 3.43 | 5.88E-04 |                                     |
|    |                                             | Cited2  | Cbp/p300-interacting transactivator, with Glu/Asp-rich carboxy-terminal domain, 2 |    |      | 1        | mo-miR-200c;                        |
|    |                                             | Sema5a  | Semaphorin-5A                                                                     |    |      | -1       | mo-miR-293;                         |
|    |                                             | Tlap2a  | Transcription factor AP-2-alpha                                                   |    |      | 1        | mo-miR-200c;                        |
|    |                                             | Nrg1    | Pro-neuregulin-1, membrane-bound isoform                                          |    |      | 1        | mo-miR-200c;                        |
|    |                                             | Tp63    | Tumor protein 63                                                                  |    |      | -1       | mo-miR-293;                         |
|    |                                             | Fn1     | Fibronectin                                                                       |    |      | 1        | mo-miR-200c;                        |
|    |                                             | Gpm6a   | Neuronal membrane glycoprotein M6-a                                               |    |      | 1        | mo-miR-200c;                        |
|    |                                             | Pend1   | 26S proteasome non-ATPase regulatory subunit 11                                   |    |      | 0        | mo-miR-141;mo-miR-200a;             |
|    |                                             | Tgfb2   | Transforming growth factor beta-2                                                 |    |      | 0        | mo-miR-141;mo-miR-200a;             |
|    |                                             | Pitx2   | Pituitary homeobox 2                                                              |    |      | 0        | mo-miR-141;mo-miR-200a;             |
|    |                                             | Zeb2    | Zinc finger E-box-binding homeobox 2                                              |    |      | 0        | mo-miR-200a;mo-miR-200c;            |
| 22 | response to transforming growth factor beta | 3.27    |                                                                                   | 11 | 3.37 | 6.77E-04 |                                     |
|    |                                             | Cited2  | Cbp/p300-interacting transactivator, with Glu/Asp-rich carboxy-terminal domain, 2 |    |      | 1        | mo-miR-200c;                        |
|    |                                             | Rock2   | Rho-associated protein kinase 2                                                   |    |      | 1        | mo-miR-200c;                        |
|    |                                             | Actr1b  | Actinin receptor type 1B                                                          |    |      | -1       | mo-miR-293;                         |
|    |                                             | Dsp     | Dentin sialophosphoprotein                                                        |    |      | 1        | mo-miR-200c;                        |
|    |                                             | Nlk     | Serine/threonine-protein kinase NLK                                               |    |      | -1       | mo-miR-208b-3p;                     |
|    |                                             | App1    | Adaptor protein, phosphotyrosine-interacting with PH domain and leucine zipper 1  |    |      | 1        | mo-miR-200c;                        |
|    |                                             | Jun     | Transcription factor AP-1                                                         |    |      | 1        | mo-miR-200c;                        |
|    |                                             | Fn1     | Fibronectin                                                                       |    |      | 1        | mo-miR-200c;                        |
|    |                                             | Nr3c1   | Glucocorticoid receptor                                                           |    |      | 1        | mo-miR-141;mo-miR-200a;mo-miR-200c; |
|    |                                             | Tgfb2   | Transforming growth factor beta-2                                                 |    |      | 0        | mo-miR-141;mo-miR-200a;             |
|    |                                             | Zeb1    | Zinc finger E-box-binding homeobox 1                                              |    |      | 0        | mo-miR-200a;mo-miR-200c;            |
| 23 | protein localization to plasma membrane     | 3.64    |                                                                                   | 12 | 3.30 | 4.67E-04 |                                     |
|    |                                             | Rock2   | Rho-associated protein kinase 2                                                   |    |      | 1        | mo-miR-200c;                        |
|    |                                             | Mim4    | Aladin                                                                            |    |      | -1       | mo-miR-293;                         |
|    |                                             | Rapgef2 | Rap guanine nucleotide exchange factor 2                                          |    |      | 1        | mo-miR-200c;                        |
|    |                                             | Gpr158  | Probable G-protein coupled receptor 158                                           |    |      | 1        | mo-miR-200c;                        |
|    |                                             | Biz1    | Basic leucine zipper nuclear factor 1                                             |    |      | 1        | mo-miR-200c;                        |
|    |                                             | Golca7  | Golgin subfamily A member 7                                                       |    |      | 1        | mo-miR-200c;                        |
|    |                                             | Nfasc   | Neurofascin                                                                       |    |      | 0        | mo-miR-141;mo-miR-200a;             |
|    |                                             | Stxbp1  | Syntaxin-binding protein 1                                                        |    |      | 0        | mo-miR-141;mo-miR-200a;             |
|    |                                             | Tspan33 | Tetraspanin                                                                       |    |      | 0        | mo-miR-141;mo-miR-200a;             |
|    |                                             | Vamp4   | Vesicle-associated membrane protein 4                                             |    |      | 0        | mo-miR-141;mo-miR-200a;             |
|    |                                             | Clasp2  | CLIP-associating protein 2                                                        |    |      | 0        | mo-miR-141;mo-miR-200a;             |
|    |                                             | Epha2   | Eph receptor A2                                                                   |    |      | 0        | mo-miR-141;mo-miR-200a;             |
| 24 | regulation of animal organ morphogenesis    | 4.09    |                                                                                   | 13 | 3.18 | 3.82E-04 |                                     |
|    |                                             | Robo2   | Roundabout guidance receptor 2                                                    |    |      | 1        | mo-miR-200c;                        |
|    |                                             | Cited2  | Cbp/p300-interacting transactivator, with Glu/Asp-rich carboxy-terminal domain, 2 |    |      | 1        | mo-miR-200c;                        |
|    |                                             | Vegfa   | Vascular endothelial growth factor A                                              |    |      | 1        | mo-miR-200c;                        |
|    |                                             | Dsp     | Dentin sialophosphoprotein                                                        |    |      | 1        | mo-miR-200c;                        |
|    |                                             | Dmp1    | Dentin matrix acidic phosphoprotein 1                                             |    |      | 1        | mo-miR-200c;                        |
|    |                                             | Tlap2a  | Transcription factor AP-2-alpha                                                   |    |      | 1        | mo-miR-200c;                        |
|    |                                             | Sulf1   | Extracellular sulfatase Sulf-1                                                    |    |      | 1        | mo-miR-200c;                        |
|    |                                             | Six4    | SIX homeobox 4                                                                    |    |      | -1       | mo-miR-293;                         |
|    |                                             | Pdgfra  | Platelet-derived growth factor receptor alpha                                     |    |      | 0        | mo-miR-141;mo-miR-200a;             |
|    |                                             | Thrb    | Thyroid hormone receptor beta                                                     |    |      | 0        | mo-miR-141;mo-miR-200a;             |
|    |                                             | Nkd1    | Naked cuticle homolog 1                                                           |    |      | 0        | mo-miR-141;mo-miR-200a;             |
|    |                                             | Tgfb2   | Transforming growth factor beta-2                                                 |    |      | 0        | mo-miR-141;mo-miR-200a;             |
|    |                                             | Sulf2   | Extracellular sulfatase                                                           |    |      | 0        | mo-miR-141;mo-miR-200a;             |
| 25 | extracellular matrix organization           | 4.50    |                                                                                   | 14 | 3.11 | 2.84E-04 |                                     |
|    |                                             | Col9a1  | Collagen alpha-1(X) chain (Fragment)                                              |    |      | -1       | mo-miR-293;                         |
|    |                                             | Tmem38b | Trimeric intracellular cation channel type B                                      |    |      | 1        | mo-miR-200c;                        |
|    |                                             | Dsp     | Dentin sialophosphoprotein                                                        |    |      | 1        | mo-miR-200c;                        |
|    |                                             | Dmp1    | Dentin matrix acidic phosphoprotein 1                                             |    |      | 1        | mo-miR-200c;                        |
|    |                                             | Tlap2a  | Transcription factor AP-2-alpha                                                   |    |      | 1        | mo-miR-200c;                        |
|    |                                             | Sulf1   | Extracellular sulfatase Sulf-1                                                    |    |      | 1        | mo-miR-200c;                        |
|    |                                             | Reck    | RCG54895, isoform CRA_a                                                           |    |      | 1        | mo-miR-200c;                        |
|    |                                             | Dcl     | Dermatopontin                                                                     |    |      | -1       | mo-miR-293;                         |
|    |                                             | Fn1     | Fibronectin                                                                       |    |      | 1        | mo-miR-200c;                        |
|    |                                             | Aplbb2  | Amyloid beta precursor protein-binding family B member 2                          |    |      | 0        | mo-miR-141;mo-miR-200a;             |
|    |                                             | Pdgfra  | Platelet-derived growth factor receptor alpha                                     |    |      | 0        | mo-miR-141;mo-miR-200a;             |
|    |                                             | Tgfb2   | Transforming growth factor beta-2                                                 |    |      | 0        | mo-miR-141;mo-miR-200a;             |
|    |                                             | Sulf2   | Extracellular sulfatase                                                           |    |      | 0        | mo-miR-141;mo-miR-200a;             |
|    |                                             | Ccdc80  | Coiled-coil domain-containing protein 80                                          |    |      | 0        | mo-miR-141;mo-miR-200a;             |
| 26 | regulation of chemotaxis                    | 4.21    |                                                                                   | 13 | 3.09 | 4.92E-04 |                                     |
|    |                                             | Robo2   | Roundabout guidance receptor 2                                                    |    |      | 1        | mo-miR-200c;                        |
|    |                                             | Lpar1   | Lysophosphatidic acid receptor 1                                                  |    |      | 1        | mo-miR-200c;                        |
|    |                                             | Slit2   | Slit homolog 2 protein (Fragment)                                                 |    |      | 1        | mo-miR-200c;                        |
|    |                                             | Mossp2  | Motile sperm domain-containing 2                                                  |    |      | 1        | mo-miR-200c;                        |
|    |                                             | Vegfa   | Vascular endothelial growth factor A                                              |    |      | 1        | mo-miR-200c;                        |
|    |                                             | Sema5a  | Semaphorin-5A                                                                     |    |      | -1       | mo-miR-293;                         |
|    |                                             | Il23a   | Interleukin-23 subunit alpha                                                      |    |      | -1       | mo-miR-293;                         |
|    |                                             | Dusp1   | Dual specificity protein phosphatase 1                                            |    |      | 1        | mo-miR-200c;                        |
|    |                                             | Fn1     | Fibronectin                                                                       |    |      | 1        | mo-miR-200c;                        |
|    |                                             | Pdgfra  | Platelet-derived growth factor receptor alpha                                     |    |      | 0        | mo-miR-141;mo-miR-200a;             |
|    |                                             | Ano6    | Anoctamin                                                                         |    |      | 0        | mo-miR-141;mo-miR-200a;             |
|    |                                             | Dusp3   | Dual-specificity phosphatase 3                                                    |    |      | 0        | mo-miR-141;mo-miR-200a;             |
|    |                                             | Tiam1   | T-cell lymphoma invasion and metastasis 1                                         |    |      | 0        | mo-miR-141;mo-miR-200a;             |
| 27 | learning or memory                          | 6.01    |                                                                                   | 18 | 3.00 | 6.33E-05 |                                     |
|    |                                             | Neto1   | Neurogranin and toll-like 1                                                       |    |      | -1       | mo-miR-293;                         |
|    |                                             | Ap1s2   | AP complex subunit sigma                                                          |    |      | 1        | mo-miR-200c;                        |
|    |                                             | Rcan2   | Calgrippin-2                                                                      |    |      | -1       | mo-miR-293;                         |
|    |                                             | Slc6a1  | Sodium- and chloride-dependent GABA transporter 1                                 |    |      | 1        | mo-miR-200c;                        |
|    |                                             | Uba6    | Similar to RIKEN cDNA 5730469D23 (Predicted)                                      |    |      | 1        | mo-miR-200c;                        |
|    |                                             | Cacna1c | Voltage-dependent L-type calcium channel subunit alpha-1C                         |    |      | 1        | mo-miR-200c;                        |
|    |                                             | Elav4   | ELAV-like protein 4                                                               |    |      | 1        | mo-miR-141;                         |
|    |                                             | Ntr1    | Pro-neuregulin-1, membrane-bound isoform                                          |    |      | 1        | mo-miR-200c;                        |
|    |                                             | Prg1r3b | Neurexin-2                                                                        |    |      | 1        | mo-miR-200c;                        |
|    |                                             | Jun     | Transcription factor AP-1                                                         |    |      | 1        | mo-miR-200c;                        |
|    |                                             | Amfr    | Autocrine motility factor receptor                                                |    |      | 1        | mo-miR-200c;                        |
|    |                                             | Rps6kb1 | Ribosomal protein S6 kinase beta-1                                                |    |      | 1        | mo-miR-200c;                        |
|    |                                             | Aif2    | AF4/FMR2 family, member 2                                                         |    |      | 0        | mo-miR-141;mo-miR-200a;             |
|    |                                             | Alp8a1  | Phospholipid-transporting ATPase                                                  |    |      | 0        | mo-miR-141;mo-miR-200a;             |
|    |                                             | Cpeb3   | Cytosolic poly(ADP-ribose) polymerization element-binding protein 3               |    |      | 0        | mo-miR-141;mo-miR-200a;             |
|    |                                             | Chr1    | Cannabinoid receptor 1                                                            |    |      | 0        | mo-miR-141;mo-miR-200a;             |
|    |                                             | Nptn    | Neuroplastin                                                                      |    |      | 0        | mo-miR-141;mo-miR-200a;             |
|    |                                             | Ctnnd2  | Catenin delta-2 (Fragment)                                                        |    |      | 0        | mo-miR-141;mo-miR-200a;             |
| 28 | kidney development                          | 6.10    |                                                                                   | 18 | 2.95 | 7.69E-05 |                                     |

|    |                                      |           |                                                                                  |    |      |                          |
|----|--------------------------------------|-----------|----------------------------------------------------------------------------------|----|------|--------------------------|
|    |                                      | Robo2     | Roundabout guidance receptor 2                                                   |    | 1    | mo-miR-200c;             |
|    |                                      | Slit2     | Slit homolog 2 protein (Fragment)                                                |    | 1    | mo-miR-200c;             |
|    |                                      | Lrp4      | Low-density lipoprotein receptor-related protein 4                               |    | 1    | mo-miR-200c;             |
|    |                                      | Vegfa     | Vascular endothelial growth factor A                                             |    | 1    | mo-miR-200c;             |
|    |                                      | Nup107    | Nuclear pore complex protein Nup107                                              |    | 1    | mo-miR-200c;             |
|    |                                      | Pkdx1     | Polycystin 1, transient receptor potential channel-interacting                   |    | 1    | mo-miR-200c;             |
|    |                                      | Dsp       | Dentin sialophosphoprotein                                                       |    | 1    | mo-miR-200c;             |
|    |                                      | Tlap2a    | Transcription factor AP-2-alpha                                                  |    | 1    | mo-miR-200c;             |
|    |                                      | Sulf1     | Extracellular sulfatase Sulf-1                                                   |    | 1    | mo-miR-200c;             |
|    |                                      | Six4      | SIX homeobox 4                                                                   |    | -1   | mo-miR-293;              |
|    |                                      | Pdgfra    | Platelet-derived growth factor receptor alpha                                    |    | 0    | mo-miR-141.mo-miR-200a;  |
|    |                                      | Tshz3     | Teashirt homolog 3                                                               |    | 0    | mo-miR-141.mo-miR-200a;  |
|    |                                      | Sim1      | Single-minded 1 (Predicted)                                                      |    | 0    | mo-miR-141.mo-miR-200a;  |
|    |                                      | Vcan      | Versican core protein (Fragments)                                                |    | 0    | mo-miR-141.mo-miR-200a;  |
|    |                                      | Hs2st1    | Heparan sulfate 2-O-sulfotransferase 1                                           |    | 0    | mo-miR-141.mo-miR-200a;  |
|    |                                      | Tgfb2     | Transforming growth factor beta-2                                                |    | 0    | mo-miR-141.mo-miR-200a;  |
|    |                                      | Sulf2     | Extracellular sulfatase                                                          |    | 0    | mo-miR-141.mo-miR-200a;  |
|    |                                      | Cyp26b1   | Cytochrome P450 26B1                                                             |    | 0    | mo-miR-141.mo-miR-200a;  |
| 29 | regulation of Wnt signaling pathway  | 5.46      |                                                                                  | 16 | 2.93 | 2.03E-04                 |
|    |                                      | Lrp4      | Low-density lipoprotein receptor-related protein 4                               |    | 1    | mo-miR-200c;             |
|    |                                      | Dlx1      | Dlx1                                                                             |    | -1   | mo-miR-293;              |
|    |                                      | Csnk1d3   | Casein kinase 1 isoform gamma-3                                                  |    | 1    | mo-miR-200c;             |
|    |                                      | Sema5a    | Semaphorin-5A                                                                    |    | -1   | mo-miR-293;              |
|    |                                      | Sulf1     | Extracellular sulfatase Sulf-1                                                   |    | 1    | mo-miR-200c;             |
|    |                                      | Nlk       | Serine/threonine-protein kinase NLK                                              |    | -1   | mo-miR-208b.3p;          |
|    |                                      | Reck      | RCG54895, isoform CRA_a                                                          |    | 1    | mo-miR-200c;             |
|    |                                      | Pnap2b    | Phospholipid phosphatase 3                                                       |    | 1    | mo-miR-200c;             |
|    |                                      | Mdic      | MyoD family inhibitor domain containing (Predicted), isoform CRA_a               |    | 1    | mo-miR-200c;             |
|    |                                      | Ctnd2     | Catenin delta-2 (Fragment)                                                       |    | 0    | mo-miR-141.mo-miR-200a;  |
|    |                                      | Tmem237   | Transmembrane protein 237                                                        |    | 0    | mo-miR-141.mo-miR-200a;  |
|    |                                      | Nkd1      | Naked cuticle homolog 1                                                          |    | 0    | mo-miR-141.mo-miR-200a;  |
|    |                                      | Tbtlx1    | Transducin (Beta)-like 1X-linked receptor 1 (Predicted)                          |    | 0    | mo-miR-141.mo-miR-200a;  |
|    |                                      | Sulf2     | Extracellular sulfatase                                                          |    | 0    | mo-miR-141.mo-miR-200a;  |
|    |                                      | Tiam1     | T-cell lymphoma invasion and metastasis 1                                        |    | 0    | mo-miR-141.mo-miR-200a;  |
|    |                                      | Zeb2      | Zinc finger E-box-binding homeobox 2                                             |    | 0    | mo-miR-200a.mo-miR-200c; |
| 30 | skin development                     | 4.44      |                                                                                  | 13 | 2.93 | 7.94E-04                 |
|    |                                      | Lrp4      | Low-density lipoprotein receptor-related protein 4                               |    | 1    | mo-miR-200c;             |
|    |                                      | Acrv1b    | Activin receptor type-1B                                                         |    | -1   | mo-miR-293;              |
|    |                                      | Pkdx1     | Polycystin 1, transient receptor potential channel-interacting                   |    | 1    | mo-miR-200c;             |
|    |                                      | Dsp       | Dentin sialophosphoprotein                                                       |    | 1    | mo-miR-200c;             |
|    |                                      | Tlap2a    | Transcription factor AP-2-alpha                                                  |    | 1    | mo-miR-200c;             |
|    |                                      | Scd1      | Acyl-CoA desaturase 1                                                            |    | 1    | mo-miR-200c;             |
|    |                                      | Erri1     | ERBB receptor feedback inhibitor 1                                               |    | 1    | mo-miR-200c;             |
|    |                                      | Tp63      | Tumor protein 63                                                                 |    | -1   | mo-miR-293;              |
|    |                                      | Tenp      | Thioredoxin-interacting protein                                                  |    | 0    | mo-miR-141.mo-miR-200a;  |
|    |                                      | Pipes3    | Prostaglandin E synthase 3                                                       |    | 0    | mo-miR-141.mo-miR-200a;  |
|    |                                      | Tgfb2     | Transforming growth factor beta-2                                                |    | 0    | mo-miR-141.mo-miR-200a;  |
|    |                                      | Cyp26b1   | Cytochrome P450 26B1                                                             |    | 0    | mo-miR-141.mo-miR-200a;  |
|    |                                      | Epha2     | Eph receptor A2                                                                  |    | 0    | mo-miR-141.mo-miR-200c;  |
| 31 | regulation of ERK1 and ERK2 cascade  | 6.52      |                                                                                  | 19 | 2.92 | 5.63E-05                 |
|    |                                      | Rarb9     | RAN-binding protein 9                                                            |    | 1    | mo-miR-200c;             |
|    |                                      | Vegfa     | Vascular endothelial growth factor A                                             |    | 1    | mo-miR-200c;             |
|    |                                      | Fbxw7     | F-box/WD repeat-containing protein 7                                             |    | 1    | mo-miR-200c;             |
|    |                                      | Gata4     | Transcription factor GATA-4                                                      |    | 1    | mo-miR-200c;             |
|    |                                      | Erri1     | ERBB receptor feedback inhibitor 1                                               |    | 1    | mo-miR-200c;             |
|    |                                      | Dusp1     | Dual specificity protein phosphatase 1                                           |    | 1    | mo-miR-200c;             |
|    |                                      | Ragel2    | Rap guanine nucleotide exchange factor 2                                         |    | 1    | mo-miR-200c;             |
|    |                                      | Jun       | Transcription factor AP-1                                                        |    | 1    | mo-miR-200c;             |
|    |                                      | Fn1       | Fibronectin                                                                      |    | 1    | mo-miR-200c;             |
|    |                                      | Pdgfra    | Platelet-derived growth factor receptor alpha                                    |    | 0    | mo-miR-141.mo-miR-200a;  |
|    |                                      | Calcr     | Calcitonin receptor                                                              |    | 0    | mo-miR-141.mo-miR-200a;  |
|    |                                      | Dstk      | Dual serine/threonine and tyrosine protein kinase                                |    | 0    | mo-miR-141.mo-miR-200a;  |
|    |                                      | Ntrc      | 5-hydroxytryptamine receptor 2C                                                  |    | 0    | mo-miR-141.mo-miR-200a;  |
|    |                                      | Ntrn      | Neuroplastin                                                                     |    | 0    | mo-miR-141.mo-miR-200a;  |
|    |                                      | Phlo1     | PH domain leucine-rich repeat protein phosphatase 1                              |    | 0    | mo-miR-141.mo-miR-200a;  |
|    |                                      | Tnfaiip83 | TNF alpha-induced protein 8-like 3                                               |    | 0    | mo-miR-141.mo-miR-200a;  |
|    |                                      | Dusp3     | Dual-specificity phosphatase 3                                                   |    | 0    | mo-miR-141.mo-miR-200a;  |
|    |                                      | Tiam1     | T-cell lymphoma invasion and metastasis 1                                        |    | 0    | mo-miR-141.mo-miR-200a;  |
|    |                                      | Epha2     | Eph receptor A2                                                                  |    | 0    | mo-miR-141.mo-miR-200a;  |
| 32 | regulation of mRNA metabolic process | 4.87      |                                                                                  | 14 | 2.87 | 6.01E-04                 |
|    |                                      | Khdbrs1   | KH domain-containing, RNA-binding, signal transduction-associated protein 1      |    | 1    | mo-miR-200c;             |
|    |                                      | Vegfa     | Vascular endothelial growth factor A                                             |    | 1    | mo-miR-200c;             |
|    |                                      | Tob1      | Protein Tob1                                                                     |    | 1    | mo-miR-200c;             |
|    |                                      | Srsf1     | RCG34610, isoform CRA_c                                                          |    | 1    | mo-miR-200c;             |
|    |                                      | Rfxox1    | RNA binding protein fox-1 homolog                                                |    | 1    | mo-miR-200c;             |
|    |                                      | Elaiv4    | ELAV-like protein 4                                                              |    | 1    | mo-miR-141;              |
|    |                                      | Srsf3     | RCG61099, isoform CRA_c                                                          |    | -1   | mo-miR-293;              |
|    |                                      | Npm1      | Nucleophosmin                                                                    |    | 1    | mo-miR-200c;             |
|    |                                      | Calcr     | Calcitonin receptor                                                              |    | 0    | mo-miR-141.mo-miR-200a;  |
|    |                                      | Dcp2      | Decapping mRNA 2                                                                 |    | 0    | mo-miR-141.mo-miR-200a;  |
|    |                                      | Cpeb3     | Cytoplasmic polyadenylation element-binding protein 3                            |    | 0    | mo-miR-141.mo-miR-200a;  |
|    |                                      | Khdbrs2   | KH domain-containing, RNA-binding, signal transduction-associated protein 2      |    | 0    | mo-miR-141.mo-miR-200a;  |
|    |                                      | Ythd2     | YTH N6-methyladenosine RNA-binding protein 2                                     |    | 0    | mo-miR-141.mo-miR-200a;  |
|    |                                      | Supt6h    | Transcription elongation factor spt6                                             |    | 0    | mo-miR-141.mo-miR-200a;  |
| 33 | gonad development                    | 5.67      |                                                                                  | 16 | 2.82 | 3.06E-04                 |
|    |                                      | Robo2     | Roundabout guidance receptor 2                                                   |    | 1    | mo-miR-200c;             |
|    |                                      | Slit2     | Slit homolog 2 protein (Fragment)                                                |    | 1    | mo-miR-200c;             |
|    |                                      | Clec2     | Clec300-interacting transactivator, with Glu/Asp-rich carboxy-terminal domain, 2 |    | 1    | mo-miR-200c;             |
|    |                                      | Vegfa     | Vascular endothelial growth factor A                                             |    | 1    | mo-miR-200c;             |
|    |                                      | Nup107    | Nuclear pore complex protein Nup107                                              |    | 1    | mo-miR-200c;             |
|    |                                      | Ank4b     | AT-rich interactive domain-containing protein 4B                                 |    | 1    | mo-miR-200c;             |
|    |                                      | Gata4     | Transcription factor GATA-4                                                      |    | 1    | mo-miR-200c;             |
|    |                                      | Emmp1     | Endoplasmic reticulum metalloproteinase 1                                        |    | 1    | mo-miR-200c;             |
|    |                                      | Six4      | SIX homeobox 4                                                                   |    | -1   | mo-miR-293;              |
|    |                                      | Acsb1     | Long-chain-fatty-acid-CoA ligase ACSBG1                                          |    | 1    | mo-miR-200c;             |
|    |                                      | Znf830    | Zinc finger protein 830                                                          |    | -1   | mo-miR-293;              |
|    |                                      | Pdgfra    | Platelet-derived growth factor receptor alpha                                    |    | 0    | mo-miR-141.mo-miR-200a;  |
|    |                                      | Cbl       | Cbl proto-oncogene                                                               |    | 0    | mo-miR-141.mo-miR-200a;  |
|    |                                      | Khl10     | Kelch-like protein 10                                                            |    | 0    | mo-miR-141.mo-miR-200a;  |
|    |                                      | Tgfb2     | Transforming growth factor beta-2                                                |    | 0    | mo-miR-141.mo-miR-200a;  |
|    |                                      | Ptx2      | Pituitary homeobox 2                                                             |    | 0    | mo-miR-141.mo-miR-200a;  |
| 34 | skeletal system morphogenesis        | 5.05      |                                                                                  | 14 | 2.77 | 8.34E-04                 |
|    |                                      | Col9a1    | Collagen alpha-1(X) chain (Fragment)                                             |    | -1   | mo-miR-293;              |
|    |                                      | Cited2    | Cbip300-interacting transactivator, with Glu/Asp-rich carboxy-terminal domain, 2 |    | 1    | mo-miR-200c;             |
|    |                                      | Mycn      | N-myc proto-oncogene protein                                                     |    | -1   | mo-miR-293;              |
|    |                                      | Vegfa     | Vascular endothelial growth factor A                                             |    | 1    | mo-miR-200c;             |
|    |                                      | Pkdx1     | Polycystin 1, transient receptor potential channel-interacting                   |    | 1    | mo-miR-200c;             |
|    |                                      | Dsp       | Dentin sialophosphoprotein                                                       |    | 1    | mo-miR-200c;             |
|    |                                      | Tlap2a    | Transcription factor AP-2-alpha                                                  |    | 1    | mo-miR-200c;             |
|    |                                      | Sulf1     | Extracellular sulfatase Sulf-1                                                   |    | 1    | mo-miR-200c;             |
|    |                                      | Six4      | SIX homeobox 4                                                                   |    | -1   | mo-miR-293;              |
|    |                                      | Ndr1      | Bifunctional heparan sulfate N-deacetylase/N-sulfotransferase 1                  |    | 1    | mo-miR-200c;             |
|    |                                      | Pdgfra    | Platelet-derived growth factor receptor alpha                                    |    | 0    | mo-miR-141.mo-miR-200a;  |
|    |                                      | Tgfb2     | Transforming growth factor beta-2                                                |    | 0    | mo-miR-141.mo-miR-200a;  |
|    |                                      | Cyp26b1   | Cytochrome P450 26B1                                                             |    | 0    | mo-miR-141.mo-miR-200a;  |
|    |                                      | Zeb1      | Zinc finger E-box-binding homeobox 1                                             |    | 0    | mo-miR-200a.mo-miR-200c; |
| 35 | in utero embryonic development       | 9.06      |                                                                                  | 25 | 2.76 | 5.95E-06                 |
|    |                                      | Slit2     | Slit homolog 2 protein (Fragment)                                                |    | 1    | mo-miR-200c;             |
|    |                                      | Clec2     | Clec300-interacting transactivator, with Glu/Asp-rich carboxy-terminal domain, 2 |    | 1    | mo-miR-200c;             |
|    |                                      | Zfp2      | Zinc finger protein, multiple 2                                                  |    | 1    | mo-miR-200c;             |
|    |                                      | Pdm1      | PR domain containing 1, with ZNF domain (Predicted)                              |    | 1    | mo-miR-200c;             |
|    |                                      | Vegfa     | Vascular endothelial growth factor A                                             |    | 1    | mo-miR-200c;             |
|    |                                      | Vash1     | Vasohibin 1                                                                      |    | 1    | mo-miR-200c;             |
|    |                                      | Acrv1b    | Activin receptor type-1B                                                         |    | -1   | mo-miR-293;              |
|    |                                      | Tpm1      | Tropomyosin alpha-1 chain                                                        |    | -1   | mo-miR-293;              |
|    |                                      | Pkdx1     | Polycystin 1, transient receptor potential channel-interacting                   |    | 1    | mo-miR-200c;             |
|    |                                      | Srsf1     | RCG34610, isoform CRA_c                                                          |    | 1    | mo-miR-200c;             |
|    |                                      | Gata4     | Transcription factor GATA-4                                                      |    | 1    | mo-miR-200c;             |
|    |                                      | Tm4sf1    | Transmembrane 4 L six family member 1                                            |    | -1   | mo-miR-293;              |
|    |                                      | Kdm6a     | Lysine demethylase 6A                                                            |    | -1   | mo-miR-293;              |
|    |                                      | Znf830    | Zinc finger protein 830                                                          |    | -1   | mo-miR-293;              |
|    |                                      | Matn3     | Matrilin-3                                                                       |    | 1    | mo-miR-200c;             |
|    |                                      | Amot      | Angiomotin                                                                       |    | 1    | mo-miR-141;              |
|    |                                      | Pdgfra    | Platelet-derived growth factor receptor alpha                                    |    | 0    | mo-miR-141.mo-miR-200a;  |
|    |                                      | Tshz3     | Teashirt homolog 3                                                               |    | 0    | mo-miR-141.mo-miR-200a;  |
|    |                                      | Pitnbc    | Phosphatidylinositol transfer protein beta isoform                               |    | 0    | mo-miR-141.mo-miR-200a;  |

|    |                                                                  |          |                                                                                  |    |      |          |                                     |
|----|------------------------------------------------------------------|----------|----------------------------------------------------------------------------------|----|------|----------|-------------------------------------|
|    |                                                                  | Myh10    | Myosin-10                                                                        |    |      | 0        | mo-miR-141.mo-miR-200a;             |
|    |                                                                  | Tb11r1   | Transducin (Beta)-like 1X-linked receptor 1 (Predicted)                          |    |      | 0        | mo-miR-141.mo-miR-200a;             |
|    |                                                                  | Grib2    | Growth factor receptor-bound protein 2                                           |    |      | 0        | mo-miR-141.mo-miR-200a;             |
|    |                                                                  | Pitx2    | Pituitary homeobox 2                                                             |    |      | 0        | mo-miR-141.mo-miR-200a;             |
|    |                                                                  | Dusp3    | Dual-specificity phosphatase 3                                                   |    |      | 0        | mo-miR-141.mo-miR-200a;             |
|    |                                                                  | Supt6h   | Transcription elongation factor spt6                                             |    |      | 0        | mo-miR-141.mo-miR-200a;             |
| 36 | regulation of developmental growth                               | 7.67     |                                                                                  | 21 | 2.74 | 5.50E-05 |                                     |
|    |                                                                  | Slit2    | Slit homolog 2 protein (Fragment)                                                |    |      | 1        | mo-miR-200c;                        |
|    |                                                                  | Ctcd2    | Cbp300-interacting transactivator, with Glu/Asp-rich carboxy-terminal domain, 2  |    |      | 1        | mo-miR-200c;                        |
|    |                                                                  | Zfp62    | Zinc finger protein, multiple 2                                                  |    |      | 1        | mo-miR-200c;                        |
|    |                                                                  | Vegfa    | Vascular endothelial growth factor A                                             |    |      | 1        | mo-miR-200c;                        |
|    |                                                                  | Sema5a   | Semaphorin-5A                                                                    |    |      | -1       | mo-miR-293;                         |
|    |                                                                  | Dssp     | Dentin sialoporphosphoprotein                                                    |    |      | 1        | mo-miR-200c;                        |
|    |                                                                  | Ctcf4    | Transcription factor GATA-4                                                      |    |      | 1        | mo-miR-200c;                        |
|    |                                                                  | Cacna1c  | Voltage-dependent L-type calcium channel subunit alpha-1C                        |    |      | 1        | mo-miR-200c;                        |
|    |                                                                  | Sqip1    | SH3-containing GRB2-like protein 3-interacting protein 1                         |    |      | 1        | mo-miR-200c;                        |
|    |                                                                  | Nrg1     | Pro-neuregulin-1, membrane-bound isoform                                         |    |      | 1        | mo-miR-200c;                        |
|    |                                                                  | Wwc3     | WWC family member 3                                                              |    |      | 1        | mo-miR-200c;                        |
|    |                                                                  | Six4     | SIX homeobox 4                                                                   |    |      | -1       | mo-miR-293;                         |
|    |                                                                  | Itih4    | Aladin                                                                           |    |      | -1       | mo-miR-293;                         |
|    |                                                                  | Rab21    | Rap-related protein Rab-21                                                       |    |      | 1        | mo-miR-200c;                        |
|    |                                                                  | Fln1     | Fibronectin                                                                      |    |      | 1        | mo-miR-200c;                        |
|    |                                                                  | Nr3c1    | Glucocorticoid receptor                                                          |    |      | 1        | mo-miR-141.mo-miR-200a.mo-miR-200c; |
|    |                                                                  | Rps6kb1  | Ribosomal protein S6 kinase beta-1                                               |    |      | 1        | mo-miR-200c;                        |
|    |                                                                  | Nkd1     | Naked cuticle homolog 1                                                          |    |      | 0        | mo-miR-141.mo-miR-200a;             |
|    |                                                                  | Siah1a   | E3 ubiquitin-protein ligase SIAH1                                                |    |      | 0        | mo-miR-141.mo-miR-200a;             |
|    |                                                                  | Ulk2     | Unc-51-like autophagy-activating kinase 2                                        |    |      | 0        | mo-miR-141.mo-miR-200a;             |
|    |                                                                  | Clasp2   | CLIP-associating protein 2                                                       |    |      | 0        | mo-miR-141.mo-miR-200a;             |
| 37 | negative regulation of growth                                    | 5.52     |                                                                                  | 15 | 2.72 | 6.69E-04 |                                     |
|    |                                                                  | Sesn1    | Sestrin 1                                                                        |    |      | 1        | mo-miR-200c;                        |
|    |                                                                  | Slit2    | Slit homolog 2 protein (Fragment)                                                |    |      | 1        | mo-miR-200c;                        |
|    |                                                                  | Ctcd2    | Cbp300-interacting transactivator, with Glu/Asp-rich carboxy-terminal domain, 2  |    |      | 1        | mo-miR-200c;                        |
|    |                                                                  | Acr1b    | Actinin receptor type-1B                                                         |    |      | -1       | mo-miR-293;                         |
|    |                                                                  | Sema5a   | Semaphorin-5A                                                                    |    |      | -1       | mo-miR-293;                         |
|    |                                                                  | Dssp     | Dentin sialoporphosphoprotein                                                    |    |      | 1        | mo-miR-200c;                        |
|    |                                                                  | Sod1     | Acyl-CoA desaturase 1                                                            |    |      | 1        | mo-miR-200c;                        |
|    |                                                                  | Fhl1     | Four and a half LIM domains protein 1                                            |    |      | 1        | mo-miR-200c;                        |
|    |                                                                  | Eaf2     | ELL-associated factor 2                                                          |    |      | -1       | mo-miR-293;                         |
|    |                                                                  | Ppp1r9b  | Neurabin-2                                                                       |    |      | 1        | mo-miR-200c;                        |
|    |                                                                  | Wwc3     | WWC family member 3                                                              |    |      | 1        | mo-miR-200c;                        |
|    |                                                                  | Apbb2    | Amyloid beta precursor protein-binding family B member 2                         |    |      | 0        | mo-miR-141.mo-miR-200a;             |
|    |                                                                  | Nkd1     | Naked cuticle homolog 1                                                          |    |      | 0        | mo-miR-141.mo-miR-200a;             |
|    |                                                                  | Tgfb2    | Transforming growth factor beta-2                                                |    |      | 0        | mo-miR-141.mo-miR-200a;             |
|    |                                                                  | Ulk2     | Unc-51-like autophagy-activating kinase 2                                        |    |      | 0        | mo-miR-141.mo-miR-200a;             |
| 38 | dephosphorylation                                                | 5.54     |                                                                                  | 15 | 2.71 | 6.92E-04 |                                     |
|    |                                                                  | Ptpn13   | Protein tyrosine phosphatase, non-receptor type 13                               |    |      | 1        | mo-miR-200c;                        |
|    |                                                                  | Ppp4r2   | Protein phosphatase 4, regulatory subunit 2                                      |    |      | 1        | mo-miR-200c;                        |
|    |                                                                  | Hdh2     | Haloacid dehalogenase-like hydrolase domain-containing protein 2                 |    |      | 1        | mo-miR-200c;                        |
|    |                                                                  | Ppap2b   | Phospholipid phosphatase 3                                                       |    |      | 1        | mo-miR-200c;                        |
|    |                                                                  | Dusp1    | Dual specificity protein phosphatase 1                                           |    |      | 1        | mo-miR-200c;                        |
|    |                                                                  | Lpin3    | Lipin 3                                                                          |    |      | 1        | mo-miR-200c;                        |
|    |                                                                  | Ptpn9    | Receptor-type tyrosine-protein phosphatase alpha                                 |    |      | -1       | mo-miR-200a;                        |
|    |                                                                  | Ptpn21   | Tyrosine-protein phosphatase non-receptor type 21                                |    |      | 1        | mo-miR-200c;                        |
|    |                                                                  | Ppp1r15b | Protein phosphatase 1, regulatory (inhibitor) subunit 15b (Predicted)            |    |      | 0        | mo-miR-141.mo-miR-200a;             |
|    |                                                                  | Ppm1f    | Protein phosphatase, Mg2+/Mn2+-dependent, 1L                                     |    |      | 0        | mo-miR-141.mo-miR-200a;             |
|    |                                                                  | Sacm1f   | Phosphatidylinositol phosphatase SAC1                                            |    |      | 0        | mo-miR-141.mo-miR-200a;             |
|    |                                                                  | Ptpn4f   | Protein tyrosine phosphatase type IVA 1                                          |    |      | 0        | mo-miR-141.mo-miR-200a;             |
|    |                                                                  | Cdc14a   | Cell division cycle 14A                                                          |    |      | 0        | mo-miR-141.mo-miR-200a;             |
|    |                                                                  | Phlpp1   | PH domain leucine-rich repeat protein phosphatase 1                              |    |      | 0        | mo-miR-141.mo-miR-200a;             |
|    |                                                                  | Dusp3    | Dual-specificity phosphatase 3                                                   |    |      | 0        | mo-miR-141.mo-miR-200a;             |
| 39 | response to ketone                                               | 6.79     |                                                                                  | 18 | 2.65 | 2.69E-04 |                                     |
|    |                                                                  | Slit2    | Slit homolog 2 protein (Fragment)                                                |    |      | 1        | mo-miR-200c;                        |
|    |                                                                  | Slc1a1f  | Solute carrier organic anion transporter family member 1A1                       |    |      | 1        | mo-miR-200c;                        |
|    |                                                                  | Rock2    | Rho-associated protein kinase 2                                                  |    |      | 1        | mo-miR-200c;                        |
|    |                                                                  | Vegfa    | Vascular endothelial growth factor A                                             |    |      | 1        | mo-miR-200c;                        |
|    |                                                                  | Dssp     | Dentin sialoporphosphoprotein                                                    |    |      | 1        | mo-miR-200c;                        |
|    |                                                                  | Erff1    | ERBB receptor feedback inhibitor 1                                               |    |      | 1        | mo-miR-200c;                        |
|    |                                                                  | Nrg1     | Pro-neuregulin-1, membrane-bound isoform                                         |    |      | 1        | mo-miR-200c;                        |
|    |                                                                  | Ppp1r9b  | Neurabin-2                                                                       |    |      | 1        | mo-miR-200c;                        |
|    |                                                                  | Dusp1    | Dual specificity protein phosphatase 1                                           |    |      | 1        | mo-miR-200c;                        |
|    |                                                                  | Fln1     | Fibronectin                                                                      |    |      | 1        | mo-miR-200c;                        |
|    |                                                                  | Nr3c1    | Glucocorticoid receptor                                                          |    |      | 1        | mo-miR-141.mo-miR-200a.mo-miR-200c; |
|    |                                                                  | Rps6kb1  | Ribosomal protein S6 kinase beta-1                                               |    |      | 1        | mo-miR-200c;                        |
|    |                                                                  | Adcy2    | Adenylate cyclase type 2                                                         |    |      | 1        | mo-miR-200c;                        |
|    |                                                                  | Npm1     | Nucleophosmin                                                                    |    |      | 1        | mo-miR-200c;                        |
|    |                                                                  | Cbl      | Cbl proto-oncogene                                                               |    |      | 0        | mo-miR-141.mo-miR-200a;             |
|    |                                                                  | Txnip    | Thioredoxin-interacting protein                                                  |    |      | 0        | mo-miR-141.mo-miR-200a;             |
|    |                                                                  | Klf6     | Kruppel-like factor 6                                                            |    |      | 0        | mo-miR-141.mo-miR-200a;             |
|    |                                                                  | Tgfb2    | Transforming growth factor beta-2                                                |    |      | 0        | mo-miR-141.mo-miR-200a;             |
| 40 | epithelial tube morphogenesis                                    | 6.95     |                                                                                  | 18 | 2.59 | 3.48E-04 |                                     |
|    |                                                                  | Slit2    | Slit homolog 2 protein (Fragment)                                                |    |      | 1        | mo-miR-200c;                        |
|    |                                                                  | Ctcd2    | Cbp300-interacting transactivator, with Glu/Asp-rich carboxy-terminal domain, 2  |    |      | 1        | mo-miR-200c;                        |
|    |                                                                  | Rock2    | Rho-associated protein kinase 2                                                  |    |      | 1        | mo-miR-200c;                        |
|    |                                                                  | Mycn     | N-myc proto-oncogene protein                                                     |    |      | -1       | mo-miR-293;                         |
|    |                                                                  | Vegfa    | Vascular endothelial growth factor A                                             |    |      | 1        | mo-miR-200c;                        |
|    |                                                                  | Pkd1     | Polycystin 1, transient receptor potential channel-interacting                   |    |      | 1        | mo-miR-200c;                        |
|    |                                                                  | Sema5a   | Semaphorin-5A                                                                    |    |      | -1       | mo-miR-293;                         |
|    |                                                                  | Dssp     | Dentin sialoporphosphoprotein                                                    |    |      | 1        | mo-miR-200c;                        |
|    |                                                                  | Tlpa2a   | Transcription factor AP-2-alpha                                                  |    |      | 1        | mo-miR-200c;                        |
|    |                                                                  | Gata4    | Transcription factor GATA-4                                                      |    |      | 1        | mo-miR-200c;                        |
|    |                                                                  | Shroom3  | Shroom family member 3                                                           |    |      | -1       | mo-miR-293;                         |
|    |                                                                  | Kdm6a    | Lysine demethylase 6A                                                            |    |      | -1       | mo-miR-293;                         |
|    |                                                                  | Nr3c1    | Glucocorticoid receptor                                                          |    |      | 1        | mo-miR-141.mo-miR-200a.mo-miR-200c; |
|    |                                                                  | Hs2st1   | Heparan sulfate 2-O-sulfotransferase 1                                           |    |      | 0        | mo-miR-141.mo-miR-200a;             |
|    |                                                                  | Tgfb2    | Transforming growth factor beta-2                                                |    |      | 0        | mo-miR-141.mo-miR-200a;             |
|    |                                                                  | Pitx2    | Pituitary homeobox 2                                                             |    |      | 0        | mo-miR-141.mo-miR-200a;             |
|    |                                                                  | Epha2    | Eph receptor A2                                                                  |    |      | 0        | mo-miR-141.mo-miR-200a;             |
|    |                                                                  | Zeb2     | Zinc finger E-box-binding homeobox 2                                             |    |      | 0        | mo-miR-200a.mo-miR-200c;            |
| 41 | supramolecular fiber organization                                | 8.49     |                                                                                  | 22 | 2.59 | 7.96E-05 |                                     |
|    |                                                                  | Clasp1   | Cyttoplasmic linker-associated protein 1                                         |    |      | 1        | mo-miR-200c;                        |
|    |                                                                  | Tpm1     | Tropomyosin alpha-1 chain                                                        |    |      | -1       | mo-miR-293;                         |
|    |                                                                  | Spast    | Spastin                                                                          |    |      | -1       | mo-miR-293;                         |
|    |                                                                  | Eps8     | Epidermal growth factor receptor kinase substrate 8                              |    |      | 1        | mo-miR-200c;                        |
|    |                                                                  | Hook1    | Hook homolog 1 (Drosophila) (Predicted)                                          |    |      | 1        | mo-miR-200c;                        |
|    |                                                                  | Shroom3  | Shroom family member 3                                                           |    |      | -1       | mo-miR-293;                         |
|    |                                                                  | Ppp1r9b  | Neurabin-2                                                                       |    |      | 1        | mo-miR-200c;                        |
|    |                                                                  | Six4     | SIX homeobox 4                                                                   |    |      | -1       | mo-miR-293;                         |
|    |                                                                  | Marcks   | Myristoylated alanine-rich C-kinase substrate                                    |    |      | 1        | mo-miR-200c;                        |
|    |                                                                  | Aqf1     | Arf-GAP domain and FG repeat-containing protein 1                                |    |      | 1        | mo-miR-200c;                        |
|    |                                                                  | Dpt      | Dermatopontin                                                                    |    |      | -1       | mo-miR-293;                         |
|    |                                                                  | Tchh     | Trichohyalin                                                                     |    |      | -1       | mo-miR-293;                         |
|    |                                                                  | Pls3     | Plastin-3                                                                        |    |      | 1        | mo-miR-200c;                        |
|    |                                                                  | Tnfrsf3  | RCC25684, isoform CRA_a                                                          |    |      | 1        | mo-miR-200c;                        |
|    |                                                                  | Pdgfra   | Platelet-derived growth factor receptor alpha                                    |    |      | 0        | mo-miR-141.mo-miR-200a;             |
|    |                                                                  | Arpc5    | Actin-related protein 2/3 complex subunit 5                                      |    |      | 0        | mo-miR-141.mo-miR-200a;             |
|    |                                                                  | Cep120   | Centrosomal protein 120                                                          |    |      | 0        | mo-miR-141.mo-miR-200a;             |
|    |                                                                  | Slain2   | SLAIN motif family, member 2                                                     |    |      | 0        | mo-miR-141.mo-miR-200a;             |
|    |                                                                  | Myh10    | Myosin-10                                                                        |    |      | 0        | mo-miR-141.mo-miR-200a;             |
|    |                                                                  | Tgfb2    | Transforming growth factor beta-2                                                |    |      | 0        | mo-miR-141.mo-miR-200a;             |
|    |                                                                  | Chp1     | Calcineurin B homologous protein 1                                               |    |      | 0        | mo-miR-141.mo-miR-200a;             |
|    |                                                                  | Clasp2   | CLIP-associating protein 2                                                       |    |      | 0        | mo-miR-141.mo-miR-200a;             |
| 42 | transmembrane receptor protein tyrosine kinase signaling pathway | 6.57     |                                                                                  | 17 | 2.59 | 5.16E-04 |                                     |
|    |                                                                  | Vegfa    | Vascular endothelial growth factor A                                             |    |      | 1        | mo-miR-200c;                        |
|    |                                                                  | Sulf1    | Extracellular sulfatase Sulf-1                                                   |    |      | 1        | mo-miR-200c;                        |
|    |                                                                  | App1     | Adaptor protein, phosphotyrosine-interacting with PH domain and leucine zipper 1 |    |      | 1        | mo-miR-200c;                        |
|    |                                                                  | Chn1     | N-chimaerin                                                                      |    |      | 1        | mo-miR-200c;                        |
|    |                                                                  | Nrg1     | Pro-neuregulin-1, membrane-bound isoform                                         |    |      | 1        | mo-miR-200c;                        |
|    |                                                                  | Rapgef2  | Rap guanine nucleotide exchange factor 2                                         |    |      | 1        | mo-miR-200c;                        |
|    |                                                                  | Lcp2     | Lymphocyte cytosolic protein 2                                                   |    |      | 1        | mo-miR-200c;                        |
|    |                                                                  | Nbs1f    | Bifunctional heparan sulfate N-deacetylase/N-sulfotransferase 1                  |    |      | 1        | mo-miR-200c;                        |
|    |                                                                  | Ptpn9    | Receptor-type tyrosine-protein phosphatase alpha                                 |    |      | -1       | mo-miR-200c;                        |
|    |                                                                  | Pdgfra   | Platelet-derived growth factor receptor alpha                                    |    |      | 0        | mo-miR-141.mo-miR-200a;             |
|    |                                                                  | Irs2     | Insulin receptor substrate 2                                                     |    |      | 0        | mo-miR-141.mo-miR-200a;             |
|    |                                                                  | Txnip    | Thioredoxin-interacting protein                                                  |    |      | 0        | mo-miR-141.mo-miR-200a;             |
|    |                                                                  | Sulf2    | Extracellular sulfatase                                                          |    |      | 0        | mo-miR-141.mo-miR-200a;             |

|    |                                             |           |                                                                                  |    |      |          |                                     |
|----|---------------------------------------------|-----------|----------------------------------------------------------------------------------|----|------|----------|-------------------------------------|
|    |                                             | Grb2      | Growth factor receptor-bound protein 2                                           |    |      | 0        | mo-miR-141.mo-miR-200a;             |
|    |                                             | Tiam1     | T-cell lymphoma invasion and metastasis 1                                        |    |      | 0        | mo-miR-141.mo-miR-200a;             |
|    |                                             | Clasp2    | CLIP-associating protein 2                                                       |    |      | 0        | mo-miR-141.mo-miR-200a;             |
|    |                                             | Epha2     | Eph receptor A2                                                                  |    |      | 0        | mo-miR-141.mo-miR-200a;             |
| 43 | negative regulation of locomotion           | 6.57      |                                                                                  | 17 | 2.59 | 5.16E-04 |                                     |
|    |                                             | Robo2     | Roundabout guidance receptor 2                                                   |    |      | 1        | mo-miR-200c;                        |
|    |                                             | Rap2c     | RAP2C, member of RAS oncogene family                                             |    |      | 1        | mo-miR-141.mo-miR-200a.mo-miR-200c; |
|    |                                             | Slt2      | Slt homolog 2 protein (Fragment)                                                 |    |      | 1        | mo-miR-200c;                        |
|    |                                             | Cited2    | Cbp300-interacting transactivator, with Glu/Asp-rich carboxy-terminal domain, 2  |    |      | 1        | mo-miR-200c;                        |
|    |                                             | Clasp1    | Cytoplasmic linker-associated protein 1                                          |    |      | 1        | mo-miR-200c;                        |
|    |                                             | Vash1     | Vasohibin 1                                                                      |    |      | 1        | mo-miR-200c;                        |
|    |                                             | Tpm1      | Tropomyosin alpha-1 chain                                                        |    |      | -1       | mo-miR-293;                         |
|    |                                             | Sema5a    | Semaphorin-5A                                                                    |    |      | -1       | mo-miR-293;                         |
|    |                                             | Sulf1     | Extracellular sulfatase Sulf-1                                                   |    |      | 1        | mo-miR-200c;                        |
|    |                                             | Nrg1      | Pro-neuregulin-1, membrane-bound isoform                                         |    |      | 1        | mo-miR-200c;                        |
|    |                                             | Reck      | RCG54895, isoform CRA_a                                                          |    |      | 1        | mo-miR-200c;                        |
|    |                                             | Mll4      | Afadin                                                                           |    |      | -1       | mo-miR-293;                         |
|    |                                             | Dusp1     | Dual specificity protein phosphatase 1                                           |    |      | 1        | mo-miR-200c;                        |
|    |                                             | Htr2c     | 5-hydroxytryptamine receptor 2C                                                  |    |      | 0        | mo-miR-141.mo-miR-200a;             |
|    |                                             | Sesn7     | Sesn7                                                                            |    |      | 0        | mo-miR-141.mo-miR-200a;             |
|    |                                             | Dusp3     | Dual-specificity phosphatase 3                                                   |    |      | 0        | mo-miR-141.mo-miR-200a;             |
|    |                                             | Clasp2    | CLIP-associating protein 2                                                       |    |      | 0        | mo-miR-141.mo-miR-200a;             |
| 44 | positive regulation of cell cycle           | 7.10      |                                                                                  | 18 | 2.53 | 4.48E-04 |                                     |
|    |                                             | Becn1     | Beclin-1                                                                         |    |      | -1       | mo-miR-293;                         |
|    |                                             | Cited2    | Cbp300-interacting transactivator, with Glu/Asp-rich carboxy-terminal domain, 2  |    |      | 1        | mo-miR-200c;                        |
|    |                                             | Rock2     | Rho-associated protein kinase 2                                                  |    |      | 1        | mo-miR-200c;                        |
|    |                                             | Pkd1      | Polycystin 1, transient receptor potential channel-interacting                   |    |      | 1        | mo-miR-200c;                        |
|    |                                             | Mdm4      | Protein Mdm4                                                                     |    |      | 1        | mo-miR-200c;                        |
|    |                                             | Spast     | Spastin                                                                          |    |      | -1       | mo-miR-293;                         |
|    |                                             | Gata4     | Transcription factor GATA-4                                                      |    |      | 1        | mo-miR-200c;                        |
|    |                                             | Tnfr3     | Tumor protein 63                                                                 |    |      | -1       | mo-miR-293;                         |
|    |                                             | Rps6kb1   | Ribosomal protein S6 kinase beta-1                                               |    |      | 1        | mo-miR-200c;                        |
|    |                                             | Npm1      | Nucleophosmin                                                                    |    |      | 1        | mo-miR-200c;                        |
|    |                                             | Tmod3     | RCG25684, isoform CRA_a                                                          |    |      | 1        | mo-miR-200c;                        |
|    |                                             | Ccnf1     | Cyclin Y-like 1                                                                  |    |      | 0        | mo-miR-200c.mo-miR-293;             |
|    |                                             | Cep120    | Centrosomal protein 120                                                          |    |      | 0        | mo-miR-141.mo-miR-200a;             |
|    |                                             | Ccne2     | Cyclin E2                                                                        |    |      | 0        | mo-miR-141.mo-miR-200a;             |
|    |                                             | Tgfb2     | Transforming growth factor beta-2                                                |    |      | 0        | mo-miR-141.mo-miR-200a;             |
|    |                                             | Cdc14a    | Cell division cycle 14A                                                          |    |      | 0        | mo-miR-141.mo-miR-200a;             |
|    |                                             | Dusp3     | Dual-specificity phosphatase 3                                                   |    |      | 0        | mo-miR-141.mo-miR-200a;             |
|    |                                             | Slfq      | Splicing factor proline and glutamine rich                                       |    |      | 0        | mo-miR-141.mo-miR-200a;             |
| 45 | cellular response to growth factor stimulus | 10.31     |                                                                                  | 25 | 2.42 | 9.27E-05 |                                     |
|    |                                             | Becn1     | Beclin-1                                                                         |    |      | -1       | mo-miR-293;                         |
|    |                                             | Mapk9     | Mitogen-activated protein kinase 9                                               |    |      | 1        | mo-miR-200c;                        |
|    |                                             | Cited2    | Cbp300-interacting transactivator, with Glu/Asp-rich carboxy-terminal domain, 2  |    |      | 1        | mo-miR-200c;                        |
|    |                                             | Lpa4      | Low-density lipoprotein receptor-related protein 4                               |    |      | 1        | mo-miR-200c;                        |
|    |                                             | Vegfa     | Vascular endothelial growth factor A                                             |    |      | 1        | mo-miR-200c;                        |
|    |                                             | Acvr1b    | Activin receptor type-1B                                                         |    |      | -1       | mo-miR-293;                         |
|    |                                             | Gata4     | Transcription factor GATA-4                                                      |    |      | 1        | mo-miR-200c;                        |
|    |                                             | Nlk       | Serine/threonine-protein kinase NLK                                              |    |      | -1       | mo-miR-208b-3p;                     |
|    |                                             | Etrf1     | ERBB receptor feedback inhibitor 1                                               |    |      | 1        | mo-miR-200c;                        |
|    |                                             | Ela4      | ELAV-like protein 4                                                              |    |      | 1        | mo-miR-141;                         |
|    |                                             | App1      | Adaptor protein, phosphotyrosine-interacting with PH domain and leucine zipper 1 |    |      | 1        | mo-miR-200c;                        |
|    |                                             | Ppp1r9b   | Neurabin-2                                                                       |    |      | 1        | mo-miR-200c;                        |
|    |                                             | Rapgef2   | Rap guanine nucleotide exchange factor 2                                         |    |      | 1        | mo-miR-200c;                        |
|    |                                             | Jun       | Transcription factor AP-1                                                        |    |      | 1        | mo-miR-200c;                        |
|    |                                             | Fln1      | Fibronectin                                                                      |    |      | 1        | mo-miR-200c;                        |
|    |                                             | Ndst1     | Bifunctional heparan sulfate N-deacetylase/N-sulfotransferase 1                  |    |      | 1        | mo-miR-200c;                        |
|    |                                             | Nr3c1     | Glucocorticoid receptor                                                          |    |      | 1        | mo-miR-141.mo-miR-200a.mo-miR-200c; |
|    |                                             | Rps6kb1   | Ribosomal protein S6 kinase beta-1                                               |    |      | 1        | mo-miR-200c;                        |
|    |                                             | Pdgfra    | Platelet-derived growth factor receptor alpha                                    |    |      | 0        | mo-miR-141.mo-miR-200a;             |
|    |                                             | Cbl       | Cbl proto-oncogene                                                               |    |      | 0        | mo-miR-141.mo-miR-200a;             |
|    |                                             | Dstyk     | Dual serine/threonine and tyrosine protein kinase                                |    |      | 0        | mo-miR-141.mo-miR-200a;             |
|    |                                             | Tgfb2     | Transforming growth factor beta-2                                                |    |      | 0        | mo-miR-141.mo-miR-200a;             |
|    |                                             | Grb2      | Growth factor receptor-bound protein 2                                           |    |      | 0        | mo-miR-141.mo-miR-200a;             |
|    |                                             | Dusp3     | Dual-specificity phosphatase 3                                                   |    |      | 0        | mo-miR-141.mo-miR-200a;             |
|    |                                             | Zeb1      | Zinc finger E-box-binding homeobox 1                                             |    |      | 0        | mo-miR-200a.mo-miR-200c;            |
| 46 | regulation of cell growth                   | 8.32      |                                                                                  | 20 | 2.41 | 5.82E-04 |                                     |
|    |                                             | Sesn1     | Sesn1                                                                            |    |      | 1        | mo-miR-200c;                        |
|    |                                             | Slt2      | Slt homolog 2 protein (Fragment)                                                 |    |      | 1        | mo-miR-200c;                        |
|    |                                             | Vegfa     | Vascular endothelial growth factor A                                             |    |      | 1        | mo-miR-200c;                        |
|    |                                             | Acvr1b    | Activin receptor type-1B                                                         |    |      | -1       | mo-miR-293;                         |
|    |                                             | Sema5a    | Semaphorin-5A                                                                    |    |      | -1       | mo-miR-293;                         |
|    |                                             | Bap1      | Ubiquitin carboxyl-terminal hydrolase BAP1                                       |    |      | 1        | mo-miR-200c;                        |
|    |                                             | Fhl1      | Four and a half LIM domains protein 1                                            |    |      | 1        | mo-miR-200c;                        |
|    |                                             | Nrg1      | Pro-neuregulin-1, membrane-bound isoform                                         |    |      | 1        | mo-miR-200c;                        |
|    |                                             | Eaf2      | ELL-associated factor 2                                                          |    |      | -1       | mo-miR-293;                         |
|    |                                             | Ppp1r9b   | Neurabin-2                                                                       |    |      | 1        | mo-miR-200c;                        |
|    |                                             | Mll4      | Afadin                                                                           |    |      | -1       | mo-miR-293;                         |
|    |                                             | Rab21     | Ras-related protein Rab-21                                                       |    |      | 1        | mo-miR-200c;                        |
|    |                                             | Fln1      | Fibronectin                                                                      |    |      | 1        | mo-miR-200c;                        |
|    |                                             | Nr3c1     | Glucocorticoid receptor                                                          |    |      | 1        | mo-miR-141.mo-miR-200a.mo-miR-200c; |
|    |                                             | Npm1      | Nucleophosmin                                                                    |    |      | 1        | mo-miR-200c;                        |
|    |                                             | Apbb2     | Amyloid beta precursor protein-binding family B member 2                         |    |      | 0        | mo-miR-141.mo-miR-200a;             |
|    |                                             | Thrb      | Prothrombin                                                                      |    |      | 0        | mo-miR-141.mo-miR-200a;             |
|    |                                             | Tgfb2     | Transforming growth factor beta-2                                                |    |      | 0        | mo-miR-141.mo-miR-200a;             |
|    |                                             | Ulk2      | Unc-51-like autophagy-activating kinase 2                                        |    |      | 0        | mo-miR-141.mo-miR-200a;             |
|    |                                             | Clasp2    | CLIP-associating protein 2                                                       |    |      | 0        | mo-miR-141.mo-miR-200a;             |
| 47 | forebrain development                       | 9.37      |                                                                                  | 22 | 2.35 | 3.55E-04 |                                     |
|    |                                             | Robo2     | Roundabout guidance receptor 2                                                   |    |      | 1        | mo-miR-200c;                        |
|    |                                             | Lpar1     | Lysophosphatidic acid receptor 1                                                 |    |      | 1        | mo-miR-200c;                        |
|    |                                             | Slt2      | Slt homolog 2 protein (Fragment)                                                 |    |      | 1        | mo-miR-200c;                        |
|    |                                             | Dlx5      | Dlx5                                                                             |    |      | -1       | mo-miR-293;                         |
|    |                                             | Sema5a    | Semaphorin-5A                                                                    |    |      | -1       | mo-miR-293;                         |
|    |                                             | Tia2a     | Transcription factor AP-2-alpha                                                  |    |      | 1        | mo-miR-200c;                        |
|    |                                             | Uba6      | Similar to RIKEN cDNA 5730469D23 (Predicted)                                     |    |      | 1        | mo-miR-200c;                        |
|    |                                             | Nrg1      | Pro-neuregulin-1, membrane-bound isoform                                         |    |      | 1        | mo-miR-200c;                        |
|    |                                             | Ppp1r9b   | Neurabin-2                                                                       |    |      | 1        | mo-miR-200c;                        |
|    |                                             | Mll4      | Afadin                                                                           |    |      | -1       | mo-miR-293;                         |
|    |                                             | Rapgef2   | Rap guanine nucleotide exchange factor 2                                         |    |      | 1        | mo-miR-200c;                        |
|    |                                             | Ndst1     | Bifunctional heparan sulfate N-deacetylase/N-sulfotransferase 1                  |    |      | 1        | mo-miR-200c;                        |
|    |                                             | Ttk2      | Tau tubulin kinase 2                                                             |    |      | 0        | mo-miR-141.mo-miR-200a;             |
|    |                                             | Ets1      | Protein C-ets-1                                                                  |    |      | 0        | mo-miR-200c.mo-miR-208b-3p;         |
|    |                                             | Arpc5     | Actin-related protein 2/3 complex subunit 5                                      |    |      | 0        | mo-miR-141.mo-miR-200a;             |
|    |                                             | Cep120    | Centrosomal protein 120                                                          |    |      | 0        | mo-miR-141.mo-miR-200a;             |
|    |                                             | Myh10     | Myosin-10                                                                        |    |      | 0        | mo-miR-141.mo-miR-200a;             |
|    |                                             | Pik2      | Phylloerythrin homobox 2                                                         |    |      | 0        | mo-miR-141.mo-miR-200a;             |
|    |                                             | Phlpp1    | PH domain leucine-rich repeat protein phosphatase 1                              |    |      | 0        | mo-miR-141.mo-miR-200a;             |
|    |                                             | Pcdh9     | Protocadherin 9                                                                  |    |      | 0        | mo-miR-141.mo-miR-200a;             |
|    |                                             | Zeb1      | Zinc finger E-box-binding homeobox 1                                             |    |      | 0        | mo-miR-200a.mo-miR-200c;            |
|    |                                             | Zeb2      | Zinc finger E-box-binding homeobox 2                                             |    |      | 0        | mo-miR-200a.mo-miR-200c;            |
| 48 | positive regulation of kinase activity      | 10.00     |                                                                                  | 23 | 2.30 | 3.19E-04 |                                     |
|    |                                             | Lpar1     | Lysophosphatidic acid receptor 1                                                 |    |      | 1        | mo-miR-200c;                        |
|    |                                             | Map4k5    | Mitogen-activated protein kinase kinase kinase                                   |    |      | 1        | mo-miR-200c;                        |
|    |                                             | Vegfa     | Vascular endothelial growth factor A                                             |    |      | 1        | mo-miR-200c;                        |
|    |                                             | Pkd1      | Polycystin 1, transient receptor potential channel-interacting                   |    |      | 1        | mo-miR-200c;                        |
|    |                                             | Fbxw7     | F-box/WD repeat-containing protein 7                                             |    |      | 1        | mo-miR-200c;                        |
|    |                                             | Il23a     | Interleukin-23 subunit alpha                                                     |    |      | -1       | mo-miR-293;                         |
|    |                                             | Nrg1      | Pro-neuregulin-1, membrane-bound isoform                                         |    |      | 1        | mo-miR-200c;                        |
|    |                                             | Marcks    | Myristoylated alanine-rich C-kinase substrate                                    |    |      | 1        | mo-miR-200c;                        |
|    |                                             | Rapgef2   | Rap guanine nucleotide exchange factor 2                                         |    |      | 1        | mo-miR-200c;                        |
|    |                                             | Mdic      | MyoD family inhibitor domain containing (Predicted), isoform CRA_a               |    |      | 1        | mo-miR-200c;                        |
|    |                                             | Mmd2      | Monocyte to macrophage differentiation-associated 2                              |    |      | 1        | mo-miR-200c;                        |
|    |                                             | Lcp2      | Lymphocyte cytosolic protein 2                                                   |    |      | 1        | mo-miR-200c;                        |
|    |                                             | Npm1      | Nucleophosmin                                                                    |    |      | 1        | mo-miR-200c;                        |
|    |                                             | Mmd       | Monocyte to macrophage differentiation factor                                    |    |      | 1        | mo-miR-200c;                        |
|    |                                             | Ccnf1     | Cyclin Y-like 1                                                                  |    |      | 0        | mo-miR-200c.mo-miR-293;             |
|    |                                             | Pdgfra    | Platelet-derived growth factor receptor alpha                                    |    |      | 0        | mo-miR-141.mo-miR-200a;             |
|    |                                             | Dstyk     | Dual serine/threonine and tyrosine protein kinase                                |    |      | 0        | mo-miR-141.mo-miR-200a;             |
|    |                                             | Thrb      | Prothrombin                                                                      |    |      | 0        | mo-miR-141.mo-miR-200a;             |
|    |                                             | Cacul1    | CDK2-associated and cullin domain-containing protein 1                           |    |      | 0        | mo-miR-141.mo-miR-200a;             |
|    |                                             | Tgfb2     | Transforming growth factor beta-2                                                |    |      | 0        | mo-miR-141.mo-miR-200a;             |
|    |                                             | Tnfaiip83 | TNF alpha-induced protein 8-like 3                                               |    |      | 0        | mo-miR-141.mo-miR-200a;             |
|    |                                             | Tiam1     | T-cell lymphoma invasion and metastasis 1                                        |    |      | 0        | mo-miR-141.mo-miR-200a;             |
|    |                                             | Zeb2      | Zinc finger E-box-binding homeobox 2                                             |    |      | 0        | mo-miR-200a.mo-miR-200c;            |
| 49 | response to wounding                        | 9.45      |                                                                                  | 21 | 2.22 | 8.57E-04 |                                     |

|    |                                                           |              |                                                                                   |    |      |                                     |
|----|-----------------------------------------------------------|--------------|-----------------------------------------------------------------------------------|----|------|-------------------------------------|
|    |                                                           | Serpind1     | Heparin cofactor 2                                                                |    | -1   | mo-miR-293;                         |
|    |                                                           | Vegfa        | Vascular endothelial growth factor A                                              |    | 1    | mo-miR-200c;                        |
|    |                                                           | Vash1        | Vasohibin 1                                                                       |    | 1    | mo-miR-200c;                        |
|    |                                                           | Tpm1         | Tropomyosin alpha-1 chain                                                         |    | -1   | mo-miR-293;                         |
|    |                                                           | Gata4        | Transcription factor GATA-4                                                       |    | 1    | mo-miR-200c;                        |
|    |                                                           | Igsf10       | Immunoglobulin superfamily member 10                                              |    | 1    | mo-miR-200c;                        |
|    |                                                           | Nrg1         | Pro-neuregulin-1, membrane-bound isoform                                          |    | 1    | mo-miR-200c;                        |
|    |                                                           | Jun          | Transcription factor AP-1                                                         |    | 1    | mo-miR-200c;                        |
|    |                                                           | Fn1          | Fibronectin                                                                       |    | 1    | mo-miR-200c;                        |
|    |                                                           | Rps6kb1      | Ribosomal protein S6 kinase beta-1                                                |    | 1    | mo-miR-200c;                        |
|    |                                                           | Pdgfra       | Platelet-derived growth factor receptor alpha                                     |    | 0    | mo-miR-141.mo-miR-200a;             |
|    |                                                           | Thrb         | Prothrombin                                                                       |    | 0    | mo-miR-141.mo-miR-200a;             |
|    |                                                           | Ets1         | Protein C-ets-1                                                                   |    | 0    | mo-miR-200c.mo-miR-208b-3p;         |
|    |                                                           | Ano6         | Anoctamin                                                                         |    | 0    | mo-miR-141.mo-miR-200a;             |
|    |                                                           | Sxbp1        | Syntaxin-binding protein 1                                                        |    | 0    | mo-miR-141.mo-miR-200a;             |
|    |                                                           | Klf6         | Kruppel-like factor 6                                                             |    | 0    | mo-miR-141.mo-miR-200a;             |
|    |                                                           | Vcan         | Versican core protein (Fragments)                                                 |    | 0    | mo-miR-141.mo-miR-200a;             |
|    |                                                           | Serpinb2     | Plasminogen activator inhibitor 2 type A                                          |    | 0    | mo-miR-141.mo-miR-200a;             |
|    |                                                           | Myh10        | Myosin-10                                                                         |    | 0    | mo-miR-141.mo-miR-200a;             |
|    |                                                           | Tgfb2        | Transforming growth factor beta-2                                                 |    | 0    | mo-miR-141.mo-miR-200a;             |
|    |                                                           | Sulf2        | Extracellular sulfatase                                                           |    | 0    | mo-miR-141.mo-miR-200a;             |
| 50 | regulation of cellular protein localization               | 10.41        |                                                                                   | 23 | 2.21 | 7.23E-04                            |
|    |                                                           | Rock2        | Rho-associated protein kinase 2                                                   |    | 1    | mo-miR-200c;                        |
|    |                                                           | Lrp4         | Low-density lipoprotein receptor-related protein 4                                |    | 1    | mo-miR-200c;                        |
|    |                                                           | Vegfa        | Vascular endothelial growth factor A                                              |    | 1    | mo-miR-200c;                        |
|    |                                                           | Rnf168       | E3 ubiquitin-protein ligase RNF168                                                |    | 1    | mo-miR-200c;                        |
|    |                                                           | Pbxw7        | F-boxWD repeat-containing protein 7                                               |    | 1    | mo-miR-200c;                        |
|    |                                                           | Pkia         | cAMP-dependent protein kinase inhibitor alpha                                     |    | 1    | mo-miR-200c;                        |
|    |                                                           | Appl1        | Adaptor protein, phosphotyrosine-interacting with PH domain and leucine zipper 1  |    | 1    | mo-miR-200c;                        |
|    |                                                           | Nrg1         | Pro-neuregulin-1, membrane-bound isoform                                          |    | 1    | mo-miR-200c;                        |
|    |                                                           | Ppp1r9b      | Neurabin-2                                                                        |    | 1    | mo-miR-200c;                        |
|    |                                                           | Miflc        | MyoD family inhibitor domain containing (Predicted), isoform CRA a                |    | 1    | mo-miR-200c;                        |
|    |                                                           | Npm1         | Nucleophosmin                                                                     |    | 1    | mo-miR-200c;                        |
|    |                                                           | Ap2b1        | AP-2 complex subunit beta                                                         |    | 0    | mo-miR-141.mo-miR-200a;             |
|    |                                                           | Thrb         | Prothrombin                                                                       |    | 0    | mo-miR-141.mo-miR-200a;             |
|    |                                                           | Ttkb2        | Tau tubulin kinase 2                                                              |    | 0    | mo-miR-141.mo-miR-200a;             |
|    |                                                           | Edem1        | alpha-1,2-Mannosidase                                                             |    | 0    | mo-miR-141.mo-miR-200a;             |
|    |                                                           | Nctn         | Neuroclastin                                                                      |    | 0    | mo-miR-141.mo-miR-200a;             |
|    |                                                           | Ccne2        | Cyclin E2                                                                         |    | 0    | mo-miR-141.mo-miR-200a;             |
|    |                                                           | Lyp1a1       | Acyl-protein thioesterase 1                                                       |    | 0    | mo-miR-141.mo-miR-200a;             |
|    |                                                           | Tgfb2        | Transforming growth factor beta-2                                                 |    | 0    | mo-miR-141.mo-miR-200a;             |
|    |                                                           | Chp1         | Calcineurin B homologous protein 1                                                |    | 0    | mo-miR-141.mo-miR-200a;             |
|    |                                                           | Supt6h       | Transcription elongation factor spt6                                              |    | 0    | mo-miR-141.mo-miR-200a;             |
|    |                                                           | Vamp4        | Vesicle-associated membrane protein 4                                             |    | 0    | mo-miR-141.mo-miR-200a;             |
|    |                                                           | Epha2        | Eph receptor A2                                                                   |    | 0    | mo-miR-141.mo-miR-200a;             |
| 51 | modulation of chemical synaptic transmission              | 10.47        |                                                                                   | 23 | 2.20 | 7.49E-04                            |
|    |                                                           | Neto1        | Neuroilin and tolloid-like 1                                                      |    | -1   | mo-miR-293;                         |
|    |                                                           | Rnf216       | Ring finger protein 216                                                           |    | -1   | mo-miR-293;                         |
|    |                                                           | Slc6a1       | Sodium- and chloride-dependent GABA transporter 1                                 |    | 1    | mo-miR-200c;                        |
|    |                                                           | Gr2          | G protein-coupled receptor kinase interacting ArfGAP 2                            |    | 1    | mo-miR-200c;                        |
|    |                                                           | Elavl4       | ELAV-like protein 4                                                               |    | 1    | mo-miR-141;                         |
|    |                                                           | Ppp1r9b      | Neurabin-2                                                                        |    | 1    | mo-miR-200c;                        |
|    |                                                           | Mll4         | Afadin                                                                            |    | -1   | mo-miR-293;                         |
|    |                                                           | Picl1        | Inactive phospholipase C-like protein 1                                           |    | 1    | mo-miR-200c;                        |
|    |                                                           | Nptx1        | Neuronal pentraxin-1                                                              |    | 1    | mo-miR-200c;                        |
|    |                                                           | Rapgef2      | Rap guanine nucleotide exchange factor 2                                          |    | 1    | mo-miR-200c;                        |
|    |                                                           | Cdh11        | Cadherin 11                                                                       |    | 1    | mo-miR-200c;                        |
|    |                                                           | Nr3c1        | Glucocorticoid receptor                                                           |    | 1    | mo-miR-141.mo-miR-200a.mo-miR-200c; |
|    |                                                           | Ptpbra       | Receptor-type tyrosine-protein phosphatase alpha                                  |    | -1   | mo-miR-200a;                        |
|    |                                                           | Tshz3        | Teashirt homolog 3                                                                |    | 0    | mo-miR-141.mo-miR-200a;             |
|    |                                                           | Htr2c        | 5-hydroxytryptamine receptor 2C                                                   |    | 0    | mo-miR-141.mo-miR-200a;             |
|    |                                                           | Cpeb3        | Cytoplasmic polyadenylation element-binding protein 3                             |    | 0    | mo-miR-141.mo-miR-200a;             |
|    |                                                           | Cnr1         | Cannabinoid receptor 1                                                            |    | 0    | mo-miR-141.mo-miR-200a;             |
|    |                                                           | P4k          | PX domain-containing protein kinase-like protein                                  |    | 0    | mo-miR-141.mo-miR-200a;             |
|    |                                                           | Nctn         | Neuroclastin                                                                      |    | 0    | mo-miR-141.mo-miR-200a;             |
|    |                                                           | Sxbp1        | Syntaxin-binding protein 1                                                        |    | 0    | mo-miR-141.mo-miR-200a;             |
|    |                                                           | Cnnnd2       | Catenin delta-2 (Fragment)                                                        |    | 0    | mo-miR-141.mo-miR-200a;             |
|    |                                                           | Ywhag        | 14-3-3 protein gamma                                                              |    | 0    | mo-miR-141.mo-miR-200a;             |
|    |                                                           | Slc6a9       | Sodium- and chloride-dependent glycine transporter 1                              |    | 0    | mo-miR-141.mo-miR-200a;             |
| 52 | negative regulation of transcription by RNA polymerase II | 16.49        |                                                                                   | 36 | 2.19 | 2.22E-06                            |
|    |                                                           | LOC102556967 | Zinc finger protein 484-like                                                      |    | -1   | mo-miR-293;                         |
|    |                                                           | Cited2       | Cbp/p300-interacting transactivator, with Glu/Asp-rich carboxy-terminal domain, 2 |    | 1    | mo-miR-200c;                        |
|    |                                                           | Zfpm2        | Zinc finger protein, multiple 2                                                   |    | 1    | mo-miR-200c;                        |
|    |                                                           | Prdm1        | PR domain containing 1, with ZNF domain (Predicted)                               |    | 1    | mo-miR-200c;                        |
|    |                                                           | Ube2i        | SUMO-conjugating enzyme UBC9                                                      |    | 1    | mo-miR-200c;                        |
|    |                                                           | Vegfa        | Vascular endothelial growth factor A                                              |    | 1    | mo-miR-200c;                        |
|    |                                                           | Jazf1        | JAZF zinc finger 1                                                                |    | 1    | mo-miR-141.mo-miR-200a.mo-miR-200c; |
|    |                                                           | Rnf168       | E3 ubiquitin-protein ligase RNF168                                                |    | 1    | mo-miR-200c;                        |
|    |                                                           | Mdm4         | Protein Mdm4                                                                      |    | 1    | mo-miR-200c;                        |
|    |                                                           | Pkia         | cAMP-dependent protein kinase inhibitor alpha                                     |    | 1    | mo-miR-200c;                        |
|    |                                                           | Tlap2a       | Transcription factor AP-2-alpha                                                   |    | 1    | mo-miR-200c;                        |
|    |                                                           | Hmbox1       | Homeobox-containing 1                                                             |    | 1    | mo-miR-200c;                        |
|    |                                                           | Tp63         | Tumor protein 63                                                                  |    | -1   | mo-miR-293;                         |
|    |                                                           | Wwc3         | WWC family member 3                                                               |    | 1    | mo-miR-200c;                        |
|    |                                                           | Mier3        | MIER family member 3                                                              |    | 0    | mo-miR-200c.mo-miR-208b-3p;         |
|    |                                                           | Dmbx1        | Diencephalon/mesencephalon homeobox 1                                             |    | 0    | mo-miR-141.mo-miR-200a;             |
|    |                                                           | Tocrn1       | Transcription elongation regulator 1                                              |    | 0    | mo-miR-141.mo-miR-200a;             |
|    |                                                           | Tnfrp        | Thioredoxin-interacting protein                                                   |    | 0    | mo-miR-141.mo-miR-200a;             |
|    |                                                           | Hmz20a       | High mobility group 20A                                                           |    | 0    | mo-miR-141.mo-miR-200a;             |
|    |                                                           | Cpeb3        | Cytoplasmic polyadenylation element-binding protein 3                             |    | 0    | mo-miR-141.mo-miR-200a;             |
|    |                                                           | Thrb         | Thyroid hormone receptor beta                                                     |    | 0    | mo-miR-141.mo-miR-200a;             |
|    |                                                           | Myt1l        | Myelin transcription factor 1-like protein                                        |    | 0    | mo-miR-141.mo-miR-200a;             |
|    |                                                           | Drl1         | Protein Drl1                                                                      |    | 0    | mo-miR-141.mo-miR-200a;             |
|    |                                                           | Sim2         | Single-minded 2 (Predicted)                                                       |    | 0    | mo-miR-141.mo-miR-200a;             |
|    |                                                           | Izf5         | IKAROS family zinc finger 5                                                       |    | 0    | mo-miR-141.mo-miR-200a;             |
|    |                                                           | Tbtlx1       | Transducin (Beta)-like 1X-linked receptor 1 (Predicted)                           |    | 0    | mo-miR-141.mo-miR-200a;             |
|    |                                                           | Sap30l       | SAP30-like                                                                        |    | 0    | mo-miR-141.mo-miR-200a;             |
|    |                                                           | Klf12        | Kruppel-like factor 12                                                            |    | 0    | mo-miR-141.mo-miR-200a;             |
|    |                                                           | Crebrf       | CREB3 regulatory factor                                                           |    | 0    | mo-miR-141.mo-miR-200a;             |
|    |                                                           | Pbx2         | Fluoritary homeobox 2                                                             |    | 0    | mo-miR-141.mo-miR-200a;             |
| 53 | protein phosphorylation                                   | 15.28        |                                                                                   | 32 | 2.09 | 1.25E-04                            |
|    |                                                           | Mapk9        | Mitogen-activated protein kinase 9                                                |    | 1    | mo-miR-200c;                        |
|    |                                                           | Tbk1         | Similar to TANK-binding kinase 1                                                  |    | 1    | mo-miR-200c;                        |
|    |                                                           | Map4k5       | Mitogen-activated protein kinase kinase kinase                                    |    | 1    | mo-miR-200c;                        |
|    |                                                           | Rock2        | Rho-associated protein kinase 2                                                   |    | 1    | mo-miR-200c;                        |
|    |                                                           | Rps6ka2      | Ribosomal protein S6 kinase                                                       |    | -1   | mo-miR-293;                         |
|    |                                                           | Pdk11        | PDK1M1 interacting kinase 1 like (Predicted)                                      |    | 1    | mo-miR-200c;                        |
|    |                                                           | Csnk1g3      | Casein kinase I isoform gamma-3                                                   |    | 1    | mo-miR-200c;                        |
|    |                                                           | Acrv1b       | Activin receptor type-1B                                                          |    | -1   | mo-miR-293;                         |
|    |                                                           | Cdk17        | Cyclin-dependent kinase 17                                                        |    | 1    | mo-miR-141.mo-miR-200a.mo-miR-200c; |
|    |                                                           | Pkd1         | Polycystin 1, transient receptor potential channel-interacting                    |    | 1    | mo-miR-200c;                        |
|    |                                                           | Prip4b       | Serine/threonine-protein kinase PRP4 homolog                                      |    | -1   | mo-miR-293;                         |
|    |                                                           | Hipk1        | Homeodomain-interacting protein kinase 1                                          |    | 1    | mo-miR-141.mo-miR-200a.mo-miR-200c; |
|    |                                                           | Hspa9        | Stress-70 protein, mitochondrial                                                  |    | 1    | mo-miR-200c;                        |
|    |                                                           | Nlk          | Serine/threonine-protein kinase NLK                                               |    | -1   | mo-miR-208b-3p;                     |
|    |                                                           | Nrg1         | Pro-neuregulin-1, membrane-bound isoform                                          |    | 1    | mo-miR-200c;                        |
|    |                                                           | Ppp1r9b      | Neurabin-2                                                                        |    | 1    | mo-miR-200c;                        |
|    |                                                           | Miflc        | MyoD family inhibitor domain containing (Predicted), isoform CRA a                |    | 1    | mo-miR-200c;                        |
|    |                                                           | Mim2         | Monocyte to macrophage differentiation-associated 2                               |    | 1    | mo-miR-200c;                        |
|    |                                                           | Rps6kb1      | Ribosomal protein S6 kinase beta-1                                                |    | 1    | mo-miR-200c;                        |
|    |                                                           | Pdgfra       | Platelet-derived growth factor receptor alpha                                     |    | 0    | mo-miR-141.mo-miR-200a;             |
|    |                                                           | Dstyk        | Dual serine/threonine and tyrosine protein kinase                                 |    | 0    | mo-miR-141.mo-miR-200a;             |
|    |                                                           | Ttkb2        | Tau tubulin kinase 2                                                              |    | 0    | mo-miR-141.mo-miR-200a;             |
|    |                                                           | P4k          | PX domain-containing protein kinase-like protein                                  |    | 0    | mo-miR-141.mo-miR-200a;             |
|    |                                                           | Pprn1        | Protein phosphatase, Mg2+/Mn2+-dependent, 1L                                      |    | 0    | mo-miR-141.mo-miR-200a;             |
|    |                                                           | Ccne2        | Cyclin E2                                                                         |    | 0    | mo-miR-141.mo-miR-200a;             |
|    |                                                           | Tgfb2        | Transforming growth factor beta-2                                                 |    | 0    | mo-miR-141.mo-miR-200a;             |
|    |                                                           | Cdk19        | Cell division cycle 2-like 6 (CDK8-like) (Predicted), isoform CRA c               |    | 0    | mo-miR-141.mo-miR-200a;             |
|    |                                                           | Ulk2         | Unc-51-like autophagy-activating kinase 2                                         |    | 0    | mo-miR-141.mo-miR-200a;             |
|    |                                                           | Cdk13        | Cyclin-dependent kinase 13                                                        |    | 0    | mo-miR-141.mo-miR-200a;             |
|    |                                                           | Epha2        | Eph receptor A2                                                                   |    | 0    | mo-miR-141.mo-miR-200a;             |
| 54 | regulation of cellular response to stress                 | 12.91        |                                                                                   | 27 | 2.09 | 5.29E-04                            |
|    |                                                           | Mapk9        | Mitogen-activated protein kinase 9                                                |    | 1    | mo-miR-200c;                        |
|    |                                                           | Rock2        | Rho-associated protein kinase 2                                                   |    | 1    | mo-miR-200c;                        |
|    |                                                           | Vegfa        | Vascular endothelial growth factor A                                              |    | 1    | mo-miR-200c;                        |
|    |                                                           | Dlxk1        | Dixin                                                                             |    | -1   | mo-miR-293;                         |

|    |                                                           |                                                                                  |    |      |                                     |
|----|-----------------------------------------------------------|----------------------------------------------------------------------------------|----|------|-------------------------------------|
|    | Vash1                                                     | Vasohibin 1                                                                      |    | 1    | mo-miR-200c;                        |
|    | Rnf168                                                    | E3 ubiquitin-protein ligase RNF168                                               |    | 1    | mo-miR-200c;                        |
|    | Fbxw7                                                     | F-box/WD repeat-containing protein 7                                             |    | 1    | mo-miR-200c;                        |
|    | Ppp4r2                                                    | Protein phosphatase 4, regulatory subunit 2                                      |    | 1    | mo-miR-200c;                        |
|    | Gata4                                                     | Transcription factor GATA-4                                                      |    | 1    | mo-miR-200c;                        |
|    | Nrg1                                                      | Pro-neuregulin-1, membrane-bound isoform                                         |    | 1    | mo-miR-200c;                        |
|    | Tp63                                                      | Tumor protein 63                                                                 |    | -1   | mo-miR-293;                         |
|    | Rnf169                                                    | Ring finger protein 169                                                          |    | 1    | mo-miR-200c;                        |
|    | Dusp1                                                     | Dual specificity protein phosphatase 1                                           |    | 1    | mo-miR-200c;                        |
|    | Mdic                                                      | MyoD family inhibitor domain containing (Predicted), isoform CRA_a               |    | 1    | mo-miR-200c;                        |
|    | HYOU1                                                     | Hypoxia up-regulated protein 1                                                   |    | -1   | mo-miR-293;                         |
|    | Bag5                                                      | BAG family molecular chaperone regulator 5                                       |    | 1    | mo-miR-200c;                        |
|    | Npm1                                                      | Nucleophosmin                                                                    |    | 1    | mo-miR-200c;                        |
|    | Ppp1r15b                                                  | Protein phosphatase 1, regulatory (inhibitor) subunit 15b (Predicted)            |    | 0    | mo-miR-141.mo-miR-200a;             |
|    | Edem1                                                     | alpha-1,2-Mannosidase                                                            |    | 0    | mo-miR-141.mo-miR-200a;             |
|    | Dek                                                       | Protein DEK                                                                      |    | 0    | mo-miR-141.mo-miR-200a;             |
|    | Tgfb2                                                     | Transforming growth factor beta-2                                                |    | 0    | mo-miR-141.mo-miR-200a;             |
|    | Crebrf                                                    | CREB3 regulatory factor                                                          |    | 0    | mo-miR-141.mo-miR-200a;             |
|    | Philp1                                                    | PH domain leucine-rich repeat protein phosphatase 1                              |    | 0    | mo-miR-141.mo-miR-200a;             |
|    | Dusp3                                                     | Dual-specificity phosphatase 3                                                   |    | 0    | mo-miR-141.mo-miR-200a;             |
|    | Tiam1                                                     | T-cell lymphoma invasion and metastasis 1                                        |    | 0    | mo-miR-141.mo-miR-200a;             |
|    | Sfpo                                                      | Splicing factor proline and glutamine rich                                       |    | 0    | mo-miR-141.mo-miR-200a;             |
|    | Zeb2                                                      | Zinc finger E-box-binding homeobox 2                                             |    | 0    | mo-miR-200a.mo-miR-200c;            |
| 55 | positive regulation of transcription by RNA polymerase II |                                                                                  | 48 | 1.97 | 1.36E-05                            |
|    | LOC102556967                                              | Zinc finger protein 484-like                                                     |    | -1   | mo-miR-293;                         |
|    | Hmgb3                                                     | High mobility group box 3                                                        |    | 1    | mo-miR-200c;                        |
|    | Tbk1                                                      | Similar to TANK-binding kinase 1                                                 |    | 1    | mo-miR-200c;                        |
|    | Cited2                                                    | Cbip300-interacting transactivator, with Glu/Asp-rich carboxy-terminal domain, 2 |    | 1    | mo-miR-200c;                        |
|    | Zfp62                                                     | Zinc finger protein, multitype 2                                                 |    | 1    | mo-miR-200c;                        |
|    | Mycn                                                      | N-myc proto-oncogene protein                                                     |    | -1   | mo-miR-293;                         |
|    | Vegfa                                                     | Vascular endothelial growth factor A                                             |    | 1    | mo-miR-200c;                        |
|    | Acrv1b                                                    | Activin receptor type-1B                                                         |    | -1   | mo-miR-293;                         |
|    | Tox1                                                      | Elongin-C                                                                        |    | 1    | mo-miR-200c;                        |
|    | Pkd1                                                      | Polycystin 1, transient receptor potential channel-interacting                   |    | 1    | mo-miR-200c;                        |
|    | Tlap2a                                                    | Transcription factor AP-2-alpha                                                  |    | 1    | mo-miR-200c;                        |
|    | Il23a                                                     | Interleukin-23 subunit alpha                                                     |    | -1   | mo-miR-293;                         |
|    | Ank4b                                                     | AT-rich interactive domain-containing protein 4B                                 |    | 1    | mo-miR-200c;                        |
|    | Gata4                                                     | Transcription factor GATA-4                                                      |    | 1    | mo-miR-200c;                        |
|    | Nrg1                                                      | Pro-neuregulin-1, membrane-bound isoform                                         |    | 1    | mo-miR-200c;                        |
|    | Eaf2                                                      | ELL-associated factor 2                                                          |    | -1   | mo-miR-293;                         |
|    | Tp63                                                      | Tumor protein 63                                                                 |    | -1   | mo-miR-293;                         |
|    | Six4                                                      | SIX homeobox 4                                                                   |    | -1   | mo-miR-293;                         |
|    | Zfp384                                                    | Zinc finger protein 384                                                          |    | -1   | mo-miR-200a;                        |
|    | Slag1                                                     | Stromal antigen 1                                                                |    | 0    | mo-miR-141.mo-miR-200a;             |
|    | Ets1                                                      | Protein C-ets-1                                                                  |    | 0    | mo-miR-200c.mo-miR-200b-3p;         |
|    | Thrb                                                      | Thyroid hormone receptor beta                                                    |    | 0    | mo-miR-141.mo-miR-200a;             |
|    | Myt1l                                                     | Myelin transcription factor 1-like protein                                       |    | 0    | mo-miR-141.mo-miR-200a;             |
|    | Drt1                                                      | Protein Drt1                                                                     |    | 0    | mo-miR-141.mo-miR-200a;             |
|    | Ikzf5                                                     | IKAROS family zinc finger 5                                                      |    | 0    | mo-miR-141.mo-miR-200a;             |
|    | Klf6                                                      | Kruppel-like factor 6                                                            |    | 0    | mo-miR-141.mo-miR-200a;             |
|    | Axin7                                                     | Axin7                                                                            |    | 0    | mo-miR-141.mo-miR-200a;             |
|    | Tbklx1                                                    | Transducin (Beta)-like 1X-linked receptor 1 (Predicted)                          |    | 0    | mo-miR-141.mo-miR-200a;             |
|    | Myb1                                                      | MYB proto-oncogene-like 1                                                        |    | 0    | mo-miR-141.mo-miR-200a;             |
|    | Tgfb2                                                     | Transforming growth factor beta-2                                                |    | 0    | mo-miR-141.mo-miR-200a;             |
| 56 | positive regulation of protein phosphorylation            |                                                                                  | 38 | 1.92 | 1.79E-04                            |
|    | Rap2c                                                     | RAP2C, member of RAS oncogene family                                             |    | 1    | mo-miR-141.mo-miR-200a.mo-miR-200c; |
|    | Lpar1                                                     | Lysophosphatidic acid receptor 1                                                 |    | 1    | mo-miR-200c;                        |
|    | Mapk9                                                     | Mitogen-activated protein kinase 9                                               |    | 1    | mo-miR-200c;                        |
|    | Map4k5                                                    | Mitogen-activated protein kinase kinase kinase                                   |    | 1    | mo-miR-200c;                        |
|    | Rock2                                                     | Rho-associated protein kinase 2                                                  |    | 1    | mo-miR-200c;                        |
|    | Lrp4                                                      | Low-density lipoprotein receptor-related protein 4                               |    | 1    | mo-miR-200c;                        |
|    | Vegfa                                                     | Vascular endothelial growth factor A                                             |    | 1    | mo-miR-200c;                        |
|    | Dxin                                                      | Dixin                                                                            |    | -1   | mo-miR-293;                         |
|    | Acrv1b                                                    | Activin receptor type-1B                                                         |    | -1   | mo-miR-293;                         |
|    | Pkd1                                                      | Polycystin 1, transient receptor potential channel-interacting                   |    | 1    | mo-miR-200c;                        |
|    | Fbxw7                                                     | F-box/WD repeat-containing protein 7                                             |    | 1    | mo-miR-200c;                        |
|    | Rqcd1                                                     | CCR4-NOT transcription complex subunit 9                                         |    | 1    | mo-miR-200c;                        |
|    | Il23a                                                     | Interleukin-23 subunit alpha                                                     |    | -1   | mo-miR-293;                         |
|    | Gata4                                                     | Transcription factor GATA-4                                                      |    | 1    | mo-miR-200c;                        |
|    | Nrg1                                                      | Pro-neuregulin-1, membrane-bound isoform                                         |    | 1    | mo-miR-200c;                        |
|    | Ppp2b                                                     | Phospholipid phosphatase 3                                                       |    | 1    | mo-miR-200c;                        |
|    | Marcks                                                    | Myristoylated alanine-rich C-kinase substrate                                    |    | 1    | mo-miR-200c;                        |
|    | Rapgef2                                                   | Rap guanine nucleotide exchange factor 2                                         |    | 1    | mo-miR-200c;                        |
|    | Mdic                                                      | MyoD family inhibitor domain containing (Predicted), isoform CRA_a               |    | 1    | mo-miR-200c;                        |
|    | Jun                                                       | Transcription factor AP-1                                                        |    | 1    | mo-miR-200c;                        |
|    | Coryl1                                                    | Cyclin Y-like 1                                                                  |    | 0    | mo-miR-200c.mo-miR-293;             |
|    | Pdgfra                                                    | Platelet-derived growth factor receptor alpha                                    |    | 0    | mo-miR-141.mo-miR-200a;             |
|    | Calcr                                                     | Calcitonin receptor                                                              |    | 0    | mo-miR-141.mo-miR-200a;             |
|    | Dsty                                                      | Dual serine/threonine and tyrosine protein kinase                                |    | 0    | mo-miR-141.mo-miR-200a;             |
|    | Thrb                                                      | Prothrombin                                                                      |    | 0    | mo-miR-141.mo-miR-200a;             |
|    | Htr2c                                                     | 5-hydroxytryptamine receptor 2C                                                  |    | 0    | mo-miR-141.mo-miR-200a;             |
|    | Nptn                                                      | Neuroplastin                                                                     |    | 0    | mo-miR-141.mo-miR-200a;             |
|    | Cacu1                                                     | CDK2-associated and cullin domain-containing protein 1                           |    | 0    | mo-miR-141.mo-miR-200a;             |
|    | Tgfb2                                                     | Transforming growth factor beta-2                                                |    | 0    | mo-miR-141.mo-miR-200a;             |
|    | Tnfip83                                                   | TNF alpha-induced protein 8-like 3                                               |    | 0    | mo-miR-141.mo-miR-200a;             |
| 57 | cellular response to endogenous stimulus                  |                                                                                  | 45 | 1.87 | 8.17E-05                            |
|    | Robo2                                                     | Roundabout guidance receptor 2                                                   |    | 1    | mo-miR-200c;                        |
|    | Sezn1                                                     | Seznin 1                                                                         |    | 1    | mo-miR-200c;                        |
|    | Becn1                                                     | Becnin 1                                                                         |    | -1   | mo-miR-293;                         |
|    | Mapk9                                                     | Mitogen-activated protein kinase 9                                               |    | 1    | mo-miR-200c;                        |
|    | Slt2                                                      | Slt homolog 2 protein (Fragment)                                                 |    | 1    | mo-miR-200c;                        |
|    | Cited2                                                    | Cbip300-interacting transactivator, with Glu/Asp-rich carboxy-terminal domain, 2 |    | 1    | mo-miR-200c;                        |
|    | Rock2                                                     | Rho-associated protein kinase 2                                                  |    | 1    | mo-miR-200c;                        |
|    | Ugt1a6                                                    | UDP-glucuronosyltransferase 1-6                                                  |    | -1   | mo-miR-293;                         |
|    | Lrp4                                                      | Low-density lipoprotein receptor-related protein 4                               |    | 1    | mo-miR-200c;                        |
|    | Vegfa                                                     | Vascular endothelial growth factor A                                             |    | 1    | mo-miR-200c;                        |
|    | Tmem38b                                                   | Trimeric intracellular cation channel type B                                     |    | 1    | mo-miR-200c;                        |
|    | Acrv1b                                                    | Activin receptor type-1B                                                         |    | -1   | mo-miR-293;                         |
|    | Dspo                                                      | Dentin sialophosphoprotein                                                       |    | 1    | mo-miR-200c;                        |
|    | Gata4                                                     | Transcription factor GATA-4                                                      |    | 1    | mo-miR-200c;                        |
|    | Nlk                                                       | Serine/threonine-protein kinase NLK                                              |    | -1   | mo-miR-200b-3p;                     |
|    | Ca2v1c                                                    | Voltage-dependent L-type calcium channel subunit alpha-1C                        |    | 1    | mo-miR-200c;                        |
|    | Erbf1                                                     | ERBB receptor feedback inhibitor 1                                               |    | 1    | mo-miR-200c;                        |
|    | Elavl4                                                    | ELAV-like protein 4                                                              |    | 1    | mo-miR-141;                         |
|    | App1                                                      | Adaptor protein, phosphotyrosine-interacting with PH domain and leucine zipper 1 |    | 1    | mo-miR-200c;                        |
|    | Oir59                                                     | Olfactory receptor 51E2                                                          |    | 1    | mo-miR-200c;                        |
|    | Pdgfra                                                    | Platelet-derived growth factor receptor alpha                                    |    | 0    | mo-miR-141.mo-miR-200a;             |
|    | Cbl                                                       | Cbl proto-oncogene                                                               |    | 0    | mo-miR-141.mo-miR-200a;             |
|    | Dsty                                                      | Dual serine/threonine and tyrosine protein kinase                                |    | 0    | mo-miR-141.mo-miR-200a;             |
|    | Irs2                                                      | Insulin receptor substrate 2                                                     |    | 0    | mo-miR-141.mo-miR-200a;             |
|    | Cpeb3                                                     | Cytoplasmic polyadenylation element-binding protein 3                            |    | 0    | mo-miR-141.mo-miR-200a;             |
|    | Thrb                                                      | Thyroid hormone receptor beta                                                    |    | 0    | mo-miR-141.mo-miR-200a;             |
|    | Ppae3                                                     | Prostaglandin E synthase 3                                                       |    | 0    | mo-miR-141.mo-miR-200a;             |
|    | Ywha9                                                     | 14-3-3 protein gamma                                                             |    | 0    | mo-miR-141.mo-miR-200a;             |
|    | Klf6                                                      | Kruppel-like factor 6                                                            |    | 0    | mo-miR-141.mo-miR-200a;             |
|    | Tgfb2                                                     | Transforming growth factor beta-2                                                |    | 0    | mo-miR-141.mo-miR-200a;             |
| 58 | cytoskeleton organization                                 |                                                                                  | 36 | 1.85 | 6.34E-04                            |
|    | Ugt8                                                      | 2-hydroxyacylphosphoglycerate 1-beta-galactosyltransferase                       |    | 1    | mo-miR-200c;                        |
|    | Rock2                                                     | Rho-associated protein kinase 2                                                  |    | 1    | mo-miR-200c;                        |
|    | Rgl1                                                      | Lethal(2) giant larvae protein homolog 1                                         |    | 1    | mo-miR-200c;                        |
|    | Clasp1                                                    | Cytoplasmic linker-associated protein 1                                          |    | 1    | mo-miR-200c;                        |
|    | Pard6b                                                    | Par-6 (Partitioning defective 6) homolog beta (C. elegans) (Predicted)           |    | 1    | mo-miR-200c;                        |
|    | Tpm1                                                      | Tropomyosin alpha-1 chain                                                        |    | -1   | mo-miR-293;                         |
|    | Spast                                                     | Spastin                                                                          |    | -1   | mo-miR-293;                         |
|    | Eps8                                                      | Epidermal growth factor receptor kinase substrate 8                              |    | 1    | mo-miR-200c;                        |
|    | Hook1                                                     | Hook homolog 1 (Drosophila) (Predicted)                                          |    | 1    | mo-miR-200c;                        |
|    | Shroom3                                                   | Shroom family member 3                                                           |    | -1   | mo-miR-293;                         |
|    | Ppp1r9b                                                   | Neurabin-2                                                                       |    | 1    | mo-miR-200c;                        |
|    | Six4                                                      | SIX homeobox 4                                                                   |    | -1   | mo-miR-293;                         |
|    | Marcks                                                    | Myristoylated alanine-rich C-kinase substrate                                    |    | 1    | mo-miR-200c;                        |
|    | Afgl1                                                     | Afg-GAP domain and FG repeat-containing protein 1                                |    | 1    | mo-miR-200c;                        |
|    | Huaf1                                                     | HAUS augmin-like complex subunit 1                                               |    | -1   | mo-miR-293;                         |
|    | Tchh                                                      | Tichohyalin                                                                      |    | -1   | mo-miR-293;                         |
|    | Pls3                                                      | Plastin-3                                                                        |    | 1    | mo-miR-200c;                        |
|    | Pdgfra                                                    | Platelet-derived growth factor receptor alpha                                    |    | 0    | mo-miR-141.mo-miR-200a;             |
|    | Elmo1                                                     | Engulfment and cell motility 1                                                   |    | 0    | mo-miR-141.mo-miR-200a;             |

|    |                                            |          |                                                                                   |    |      |                                     |
|----|--------------------------------------------|----------|-----------------------------------------------------------------------------------|----|------|-------------------------------------|
|    |                                            | Ttk2     | Tau tubulin kinase 2                                                              |    | 0    | mo-miR-141.mo-miR-200a;             |
|    |                                            | Ampc5    | Actin-related protein 2/3 complex subunit 5                                       |    | 0    | mo-miR-141.mo-miR-200a;             |
|    |                                            | Map7d1   | MAP7 domain-containing 1                                                          |    | 0    | mo-miR-141.mo-miR-200a;             |
|    |                                            | Cep120   | Centrosomal protein 120                                                           |    | 0    | mo-miR-141.mo-miR-200a;             |
|    |                                            | Slain2   | SLAIN motif family, member 2                                                      |    | 0    | mo-miR-141.mo-miR-200a;             |
|    |                                            | Syne3    | Spectrin repeat-containing, nuclear envelope family member 3                      |    | 0    | mo-miR-141.mo-miR-200a;             |
|    |                                            | Myn10    | Mynosin-10                                                                        |    | 0    | mo-miR-141.mo-miR-200a;             |
|    |                                            | Abxn7    | Abxn7                                                                             |    | 0    | mo-miR-141.mo-miR-200a;             |
|    |                                            | Sept7    | Septin-7                                                                          |    | 0    | mo-miR-141.mo-miR-200a;             |
|    |                                            | Cdc14a   | Cell division cycle 14A                                                           |    | 0    | mo-miR-141.mo-miR-200a;             |
|    |                                            | Chp1     | Calcineurin B homologous protein 1                                                |    | 0    | mo-miR-141.mo-miR-200a;             |
| 59 | positive regulation of signal transduction | 30.07    |                                                                                   | 54 | 1.80 | 3.93E-05                            |
|    |                                            | Robo2    | Roundabout guidance receptor 2                                                    |    | 1    | mo-miR-200c;                        |
|    |                                            | Nesr1    | Neurolepin and toll-like 1                                                        |    | -1   | mo-miR-293;                         |
|    |                                            | Lpar1    | Lysophosphatidic acid receptor 1                                                  |    | 1    | mo-miR-200c;                        |
|    |                                            | Mapk9    | Mitogen-activated protein kinase 9                                                |    | 1    | mo-miR-200c;                        |
|    |                                            | Khdrbs1  | KH domain-containing, RNA-binding, signal transduction-associated protein 1       |    | 1    | mo-miR-200c;                        |
|    |                                            | Tbk1     | Similar to TANK-binding kinase 1                                                  |    | 1    | mo-miR-200c;                        |
|    |                                            | Map4k5   | Mitogen-activated protein kinase kinase kinase kinase                             |    | 1    | mo-miR-200c;                        |
|    |                                            | Cited2   | Cbp/p300-interacting transactivator, with Glu/Asp-rich carboxy-terminal domain, 2 |    | 1    | mo-miR-200c;                        |
|    |                                            | Rock2    | Rho-associated protein kinase 2                                                   |    | 1    | mo-miR-200c;                        |
|    |                                            | Ube2l    | SUMO-conjugating enzyme UBC9                                                      |    | 1    | mo-miR-200c;                        |
|    |                                            | Veofa    | Vascular endothelial growth factor A                                              |    | 1    | mo-miR-200c;                        |
|    |                                            | Dlxd1    | Dixin                                                                             |    | -1   | mo-miR-293;                         |
|    |                                            | Csnk1q3  | Casein kinase I isoform gamma-3                                                   |    | 1    | mo-miR-200c;                        |
|    |                                            | Acr1b    | Activin receptor type-1B                                                          |    | -1   | mo-miR-293;                         |
|    |                                            | Zfp423   | Zinc finger protein 423                                                           |    | 1    | mo-miR-141.mo-miR-200a.mo-miR-200c; |
|    |                                            | Sema5a   | Semaphorin-5A                                                                     |    | -1   | mo-miR-293;                         |
|    |                                            | Fbxw7    | F-box/WD repeat-containing protein 7                                              |    | 1    | mo-miR-200c;                        |
|    |                                            | Rqpd1    | CCR4-NOT transcription complex subunit 9                                          |    | 1    | mo-miR-200c;                        |
|    |                                            | Eps8     | Epidermal growth factor receptor kinase substrate 8                               |    | 1    | mo-miR-200c;                        |
|    |                                            | It23a    | Interleukin-23 subunit alpha                                                      |    | -1   | mo-miR-293;                         |
|    |                                            | Skp2     | S-phase kinase-associated protein 2                                               |    | 1    | mo-miR-200c;                        |
|    |                                            | Sulf1    | Extracellular sulfatase Sulf-1                                                    |    | 1    | mo-miR-200c;                        |
|    |                                            | Gata4    | Transcription factor GATA-4                                                       |    | 1    | mo-miR-200c;                        |
|    |                                            | Pdgfra   | Platelet-derived growth factor receptor alpha                                     |    | 0    | mo-miR-141.mo-miR-200a;             |
|    |                                            | Calcr    | Calcitonin receptor                                                               |    | 0    | mo-miR-141.mo-miR-200a;             |
|    |                                            | Cbl      | Cbl proto-oncogene                                                                |    | 0    | mo-miR-141.mo-miR-200a;             |
|    |                                            | Dtyk     | Dual serine/threonine and tyrosine protein kinase                                 |    | 0    | mo-miR-141.mo-miR-200a;             |
|    |                                            | Thrb     | Prothrombin                                                                       |    | 0    | mo-miR-141.mo-miR-200a;             |
|    |                                            | Htr2c    | 5-hydroxytryptamine receptor 2C                                                   |    | 0    | mo-miR-141.mo-miR-200a;             |
|    |                                            | Nptn     | Neuropilin                                                                        |    | 0    | mo-miR-141.mo-miR-200a;             |
| 60 | response to lipid                          | 23.38    |                                                                                   | 41 | 1.75 | 5.95E-04                            |
|    |                                            | Pls3     | Phospholipid scramblase 3                                                         |    | 1    | mo-miR-200c;                        |
|    |                                            | Lpar1    | Lysophosphatidic acid receptor 1                                                  |    | 1    | mo-miR-200c;                        |
|    |                                            | Mapk9    | Mitogen-activated protein kinase 9                                                |    | 1    | mo-miR-200c;                        |
|    |                                            | Slit2    | Slit homolog 2 protein (Fragment)                                                 |    | 1    | mo-miR-200c;                        |
|    |                                            | Slc01a1  | Solute carrier organic anion transporter family member 1A1                        |    | 1    | mo-miR-200c;                        |
|    |                                            | Rock2    | Rho-associated protein kinase 2                                                   |    | 1    | mo-miR-200c;                        |
|    |                                            | Slc6a1   | Sodium- and chloride-dependent GABA transporter 1                                 |    | 1    | mo-miR-200c;                        |
|    |                                            | Ugt1a6   | UDP-glucuronosyltransferase 1-6                                                   |    | -1   | mo-miR-293;                         |
|    |                                            | Veofa    | Vascular endothelial growth factor A                                              |    | 1    | mo-miR-200c;                        |
|    |                                            | Dsp      | Dentin sialophosphoprotein                                                        |    | 1    | mo-miR-200c;                        |
|    |                                            | Tlaa2a   | Transcription factor AP-2-alpha                                                   |    | 1    | mo-miR-200c;                        |
|    |                                            | Sod1     | Acyl-CoA desaturase 1                                                             |    | 1    | mo-miR-200c;                        |
|    |                                            | Gata4    | Transcription factor GATA-4                                                       |    | 1    | mo-miR-200c;                        |
|    |                                            | Erfi1    | ERBB receptor feedback inhibitor 1                                                |    | 1    | mo-miR-200c;                        |
|    |                                            | Nr1      | Pro-neurexlin-1, membrane-bound isoform                                           |    | 1    | mo-miR-200c;                        |
|    |                                            | Olr59    | Olfactory receptor 51E2                                                           |    | 1    | mo-miR-200c;                        |
|    |                                            | Ppp1r9b  | Neurabin-2                                                                        |    | 1    | mo-miR-200c;                        |
|    |                                            | Dusp1    | Dual specificity protein phosphatase 1                                            |    | 1    | mo-miR-200c;                        |
|    |                                            | Pdgfra   | Platelet-derived growth factor receptor alpha                                     |    | 0    | mo-miR-141.mo-miR-200a;             |
|    |                                            | Calcr    | Calcitonin receptor                                                               |    | 0    | mo-miR-141.mo-miR-200a;             |
|    |                                            | Cbl      | Cbl proto-oncogene                                                                |    | 0    | mo-miR-141.mo-miR-200a;             |
|    |                                            | Txnip    | Thioredoxin-interacting protein                                                   |    | 0    | mo-miR-141.mo-miR-200a;             |
|    |                                            | Thbd     | Thrombomodulin                                                                    |    | 0    | mo-miR-141.mo-miR-200a;             |
|    |                                            | Ets1     | Protein C-ets-1                                                                   |    | 0    | mo-miR-200c.mo-miR-208b-3p;         |
|    |                                            | Thrb     | Thyroid hormone receptor beta                                                     |    | 0    | mo-miR-141.mo-miR-200a;             |
|    |                                            | Cnr1     | Cannabinoid receptor 1                                                            |    | 0    | mo-miR-141.mo-miR-200a;             |
|    |                                            | Sbtp1    | Syntaxin-binding protein 1                                                        |    | 0    | mo-miR-141.mo-miR-200a;             |
|    |                                            | Pges3    | Prostaglandin E synthase 3                                                        |    | 0    | mo-miR-141.mo-miR-200a;             |
|    |                                            | Tgfb2    | Transforming growth factor beta-2                                                 |    | 0    | mo-miR-141.mo-miR-200a;             |
|    |                                            | Ptx2     | Pituitary homeobox 2                                                              |    | 0    | mo-miR-141.mo-miR-200a;             |
| 61 | response to hormone                        | 23.54    |                                                                                   | 41 | 1.74 | 8.55E-04                            |
|    |                                            | Robo2    | Roundabout guidance receptor 2                                                    |    | 1    | mo-miR-200c;                        |
|    |                                            | Slit2    | Slit homolog 2 protein (Fragment)                                                 |    | 1    | mo-miR-200c;                        |
|    |                                            | Slc01a1  | Solute carrier organic anion transporter family member 1A1                        |    | 1    | mo-miR-200c;                        |
|    |                                            | Rock2    | Rho-associated protein kinase 2                                                   |    | 1    | mo-miR-200c;                        |
|    |                                            | Slc6a1   | Sodium- and chloride-dependent GABA transporter 1                                 |    | 1    | mo-miR-200c;                        |
|    |                                            | Ugt1a6   | UDP-glucuronosyltransferase 1-6                                                   |    | -1   | mo-miR-293;                         |
|    |                                            | Veofa    | Vascular endothelial growth factor A                                              |    | 1    | mo-miR-200c;                        |
|    |                                            | Dsp      | Dentin sialophosphoprotein                                                        |    | 1    | mo-miR-200c;                        |
|    |                                            | Gata4    | Transcription factor GATA-4                                                       |    | 1    | mo-miR-200c;                        |
|    |                                            | Hspa9    | Stress-70 protein, mitochondrial                                                  |    | 1    | mo-miR-200c;                        |
|    |                                            | Erfi1    | ERBB receptor feedback inhibitor 1                                                |    | 1    | mo-miR-200c;                        |
|    |                                            | Appl1    | Adaptor protein, phosphotyrosine-interacting with PH domain and leucine zipper 1  |    | 1    | mo-miR-200c;                        |
|    |                                            | Nr1      | Pro-neurexlin-1, membrane-bound isoform                                           |    | 1    | mo-miR-200c;                        |
|    |                                            | Olr59    | Olfactory receptor 51E2                                                           |    | 1    | mo-miR-200c;                        |
|    |                                            | Ppp1r9b  | Neurabin-2                                                                        |    | 1    | mo-miR-200c;                        |
|    |                                            | Dusp1    | Dual specificity protein phosphatase 1                                            |    | 1    | mo-miR-200c;                        |
|    |                                            | Pdgfra   | Platelet-derived growth factor receptor alpha                                     |    | 0    | mo-miR-141.mo-miR-200a;             |
|    |                                            | Calcr    | Calcitonin receptor                                                               |    | 0    | mo-miR-141.mo-miR-200a;             |
|    |                                            | Cbl      | Cbl proto-oncogene                                                                |    | 0    | mo-miR-141.mo-miR-200a;             |
|    |                                            | Thrb     | Prothrombin                                                                       |    | 0    | mo-miR-141.mo-miR-200a;             |
|    |                                            | Ins2     | Insulin receptor substrate 2                                                      |    | 0    | mo-miR-141.mo-miR-200a;             |
|    |                                            | Txnip    | Thioredoxin-interacting protein                                                   |    | 0    | mo-miR-141.mo-miR-200a;             |
|    |                                            | Ets1     | Protein C-ets-1                                                                   |    | 0    | mo-miR-200c.mo-miR-208b-3p;         |
|    |                                            | Alk2     | Adenylate kinase 2, mitochondrial                                                 |    | 0    | mo-miR-141.mo-miR-200a;             |
|    |                                            | Thrb     | Thyroid hormone receptor beta                                                     |    | 0    | mo-miR-141.mo-miR-200a;             |
|    |                                            | Sbtp1    | Syntaxin-binding protein 1                                                        |    | 0    | mo-miR-141.mo-miR-200a;             |
|    |                                            | Pges3    | Prostaglandin E synthase 3                                                        |    | 0    | mo-miR-141.mo-miR-200a;             |
|    |                                            | Ywha9    | 14-3-3 protein gamma                                                              |    | 0    | mo-miR-141.mo-miR-200a;             |
|    |                                            | Tgfb2    | Transforming growth factor beta-2                                                 |    | 0    | mo-miR-141.mo-miR-200a;             |
|    |                                            | Grt2     | Growth factor receptor-bound protein 2                                            |    | 0    | mo-miR-141.mo-miR-200a;             |
| 62 | regulation of cell death                   | 32.93    |                                                                                   | 55 | 1.67 | 2.40E-04                            |
|    |                                            | Lpar1    | Lysophosphatidic acid receptor 1                                                  |    | 1    | mo-miR-200c;                        |
|    |                                            | Bcln1    | Bcln1                                                                             |    | -1   | mo-miR-293;                         |
|    |                                            | Mapk9    | Mitogen-activated protein kinase 9                                                |    | 1    | mo-miR-200c;                        |
|    |                                            | Slit2    | Slit homolog 2 protein (Fragment)                                                 |    | 1    | mo-miR-200c;                        |
|    |                                            | Cited2   | Cbp/p300-interacting transactivator, with Glu/Asp-rich carboxy-terminal domain, 2 |    | 1    | mo-miR-200c;                        |
|    |                                            | Zfp2     | Zinc finger protein, multitype 2                                                  |    | 1    | mo-miR-200c;                        |
|    |                                            | Rps6ka2  | Ribosomal protein S6 kinase                                                       |    | -1   | mo-miR-293;                         |
|    |                                            | Mycn     | N-myc proto-oncogene protein                                                      |    | -1   | mo-miR-293;                         |
|    |                                            | Veofa    | Vascular endothelial growth factor A                                              |    | 1    | mo-miR-200c;                        |
|    |                                            | Mdm4     | Protein Mdm4                                                                      |    | 1    | mo-miR-200c;                        |
|    |                                            | Sema5a   | Semaphorin-5A                                                                     |    | -1   | mo-miR-293;                         |
|    |                                            | Fbxw7    | F-box/WD repeat-containing protein 7                                              |    | 1    | mo-miR-200c;                        |
|    |                                            | Dsp      | Dentin sialophosphoprotein                                                        |    | 1    | mo-miR-200c;                        |
|    |                                            | Tlaa2a   | Transcription factor AP-2-alpha                                                   |    | 1    | mo-miR-200c;                        |
|    |                                            | Skp2     | S-phase kinase-associated protein 2                                               |    | 1    | mo-miR-200c;                        |
|    |                                            | Gata4    | Transcription factor GATA-4                                                       |    | 1    | mo-miR-200c;                        |
|    |                                            | Aptb2    | Amyloid beta precursor protein-binding family B member 2                          |    | 0    | mo-miR-141.mo-miR-200a;             |
|    |                                            | Calcr    | Calcitonin receptor                                                               |    | 0    | mo-miR-141.mo-miR-200a;             |
|    |                                            | Cbl      | Cbl proto-oncogene                                                                |    | 0    | mo-miR-141.mo-miR-200a;             |
|    |                                            | Dtyk     | Dual serine/threonine and tyrosine protein kinase                                 |    | 0    | mo-miR-141.mo-miR-200a;             |
|    |                                            | Unc5c    | Netrin receptor UNC5C                                                             |    | 0    | mo-miR-141.mo-miR-200a;             |
|    |                                            | Ap2b1    | AP-2 complex subunit beta                                                         |    | 0    | mo-miR-141.mo-miR-200a;             |
|    |                                            | Ins2     | Insulin receptor substrate 2                                                      |    | 0    | mo-miR-141.mo-miR-200a;             |
|    |                                            | Txnip    | Thioredoxin-interacting protein                                                   |    | 0    | mo-miR-141.mo-miR-200a;             |
|    |                                            | Ets1     | Protein C-ets-1                                                                   |    | 0    | mo-miR-200c.mo-miR-208b-3p;         |
|    |                                            | Ano6     | Anoctamin                                                                         |    | 0    | mo-miR-141.mo-miR-200a;             |
|    |                                            | Cnr1     | Cannabinoid receptor 1                                                            |    | 0    | mo-miR-141.mo-miR-200a;             |
|    |                                            | Sbtp1    | Syntaxin-binding protein 1                                                        |    | 0    | mo-miR-141.mo-miR-200a;             |
|    |                                            | Pges3    | Prostaglandin E synthase 3                                                        |    | 0    | mo-miR-141.mo-miR-200a;             |
|    |                                            | Serpinb2 | Plasminogen activator inhibitor 2 type A                                          |    | 0    | mo-miR-141.mo-miR-200a;             |
| 63 | cellular component assembly                | 43.77    |                                                                                   | 73 | 1.67 | 1.84E-05                            |



|    |                                                               |            |                                                                                  |    |      |                                     |
|----|---------------------------------------------------------------|------------|----------------------------------------------------------------------------------|----|------|-------------------------------------|
|    |                                                               | Ugt8       | 2-hydroxyacylsphingosine 1-beta-galactosyltransferase                            |    | 1    | mo-miR-200c;                        |
|    |                                                               | Lpar1      | Lysophosphatidic acid receptor 1                                                 |    | 1    | mo-miR-200c;                        |
|    |                                                               | Becn1      | Becn1-1                                                                          |    | -1   | mo-miR-293;                         |
|    |                                                               | Khdrbs1    | KH domain-containing, RNA-binding, signal transduction-associated protein 1      |    | 1    | mo-miR-200c;                        |
|    |                                                               | Coa3       | Cytochrome C oxidase assembly factor 3                                           |    | -1   | mo-miR-293;                         |
|    |                                                               | Rgl1       | Lethal(2) giant larvae protein homolog 1                                         |    | 1    | mo-miR-200c;                        |
|    |                                                               | Slc6a1     | Sodium- and chloride-dependent GABA transporter 1                                |    | 1    | mo-miR-200c;                        |
|    |                                                               | Cisp1      | Cytoplasmic linker-associated protein 1                                          |    | 1    | mo-miR-200c;                        |
|    |                                                               | Par6b      | Par-6 (Partitioning defective 6) homolog beta (C. elegans) (Predicted)           |    | 1    | mo-miR-200c;                        |
|    |                                                               | Lrp4       | Low-density lipoprotein receptor-related protein 4                               |    | 1    | mo-miR-200c;                        |
|    |                                                               | Kcnd2      | Potassium voltage-gated channel subfamily D member 2                             |    | 1    | mo-miR-200c;                        |
|    |                                                               | Tpm1       | Tropomyosin alpha-1 chain                                                        |    | -1   | mo-miR-293;                         |
|    |                                                               | Nup107     | Nuclear pore complex protein Nup107                                              |    | 1    | mo-miR-200c;                        |
|    |                                                               | Pik1       | Polycystin 1, transient receptor potential channel-interacting                   |    | 1    | mo-miR-200c;                        |
|    |                                                               | Mdm4       | Protein Mdm4                                                                     |    | 1    | mo-miR-200c;                        |
|    |                                                               | Spast      | Spastin                                                                          |    | -1   | mo-miR-293;                         |
|    |                                                               | Nap1f5     | Nucleosome assembly protein 1-like 5                                             |    | 1    | mo-miR-200c;                        |
|    |                                                               | Srsf1      | RCG34610, isoform CRA_c                                                          |    | 1    | mo-miR-200c;                        |
|    |                                                               | Pdgfra     | Platelet-derived growth factor receptor alpha                                    |    | 0    | mo-miR-141.mo-miR-200a;             |
|    |                                                               | Nfasc      | Neurofascin                                                                      |    | 0    | mo-miR-141.mo-miR-200a;             |
|    |                                                               | Ap2b1      | AP-2 complex subunit beta                                                        |    | 0    | mo-miR-141.mo-miR-200a;             |
|    |                                                               | Ttk2       | Tau tubulin kinase 2                                                             |    | 0    | mo-miR-141.mo-miR-200a;             |
|    |                                                               | Ano6       | Anoctamin                                                                        |    | 0    | mo-miR-141.mo-miR-200a;             |
|    |                                                               | Prsm11     | 26S proteasome non-ATPase regulatory subunit 11                                  |    | 0    | mo-miR-141.mo-miR-200a;             |
|    |                                                               | Oat        | Omitheine aminotransferase, mitochondrial                                        |    | 0    | mo-miR-200c.mo-miR-293;             |
|    |                                                               | Ikarf5     | IKAROS family zinc finger 5                                                      |    | 0    | mo-miR-141.mo-miR-200a;             |
|    |                                                               | Ndn        | Neuroplastin                                                                     |    | 0    | mo-miR-141.mo-miR-200a;             |
|    |                                                               | Sbbp1      | Syntaxin-binding protein 1                                                       |    | 0    | mo-miR-141.mo-miR-200a;             |
|    |                                                               | Ctnd2      | Catenin delta-2 (Fragment)                                                       |    | 0    | mo-miR-141.mo-miR-200a;             |
|    |                                                               | Ptges3     | Prostaglandin E synthase 3                                                       |    | 0    | mo-miR-141.mo-miR-200a;             |
| 64 | regulation of cell population proliferation                   | 32.52      |                                                                                  | 52 | 1.60 | 9.23E-04                            |
|    |                                                               | Becn1      | Becn1-1                                                                          |    | -1   | mo-miR-293;                         |
|    |                                                               | Slit2      | Slit homolog 2 protein (Fragment)                                                |    | 1    | mo-miR-200c;                        |
|    |                                                               | Cited2     | Cbfp300-interacting transactivator, with Glu/Asp-rich carboxy-terminal domain, 2 |    | 1    | mo-miR-200c;                        |
|    |                                                               | Zfpm2      | Zinc finger protein, multitype 2                                                 |    | 1    | mo-miR-200c;                        |
|    |                                                               | Pdrlm1     | PR domain containing 1, with ZNF domain (Predicted)                              |    | 1    | mo-miR-200c;                        |
|    |                                                               | Rps6ka2    | Ribosomal protein S6 kinase                                                      |    | -1   | mo-miR-293;                         |
|    |                                                               | Mycn       | N-myc proto-oncogene protein                                                     |    | -1   | mo-miR-293;                         |
|    |                                                               | Vegfa      | Vascular endothelial growth factor A                                             |    | 1    | mo-miR-200c;                        |
|    |                                                               | Tob1       | Protein Tob1                                                                     |    | 1    | mo-miR-200c;                        |
|    |                                                               | Vash1      | Vasohibin 1                                                                      |    | 1    | mo-miR-200c;                        |
|    |                                                               | Tpm1       | Tropomyosin alpha-1 chain                                                        |    | -1   | mo-miR-293;                         |
|    |                                                               | Mdm4       | Protein Mdm4                                                                     |    | 1    | mo-miR-200c;                        |
|    |                                                               | Sema5a     | Semaphorin-5A                                                                    |    | -1   | mo-miR-293;                         |
|    |                                                               | Dspa       | Dentin sialoporphosphoprotein                                                    |    | 1    | mo-miR-200c;                        |
|    |                                                               | Tlap2a     | Transcription factor AP-2-alpha                                                  |    | 1    | mo-miR-200c;                        |
|    |                                                               | Il23a      | Interleukin-23 subunit alpha                                                     |    | -1   | mo-miR-293;                         |
|    |                                                               | Skp2       | S-phase kinase-associated protein 2                                              |    | 1    | mo-miR-200c;                        |
|    |                                                               | Hipk1      | Homeodomain-interacting protein kinase 1                                         |    | 1    | mo-miR-141.mo-miR-200a.mo-miR-200c; |
|    |                                                               | Sulf1      | Extracellular sulfatase Sulf-1                                                   |    | 1    | mo-miR-200c;                        |
|    |                                                               | Gata4      | Transcription factor GATA-4                                                      |    | 1    | mo-miR-200c;                        |
|    |                                                               | Adk        | Adenosine kinase                                                                 |    | 1    | mo-miR-200c;                        |
|    |                                                               | Pdgfra     | Platelet-derived growth factor receptor alpha                                    |    | 0    | mo-miR-141.mo-miR-200a;             |
|    |                                                               | Thrb       | Prothrombin                                                                      |    | 0    | mo-miR-141.mo-miR-200a;             |
|    |                                                               | Irs2       | Insulin receptor substrate 2                                                     |    | 0    | mo-miR-141.mo-miR-200a;             |
|    |                                                               | Txnip      | Thioredoxin-interacting protein                                                  |    | 0    | mo-miR-141.mo-miR-200a;             |
|    |                                                               | Ets1       | Protein C-ets-1                                                                  |    | 0    | mo-miR-200c.mo-miR-208b-3p;         |
|    |                                                               | Thrb       | Thyroid hormone receptor beta                                                    |    | 0    | mo-miR-141.mo-miR-200a;             |
|    |                                                               | Pds5b      | Sister chromatid cohesion protein PDS5 homolog B                                 |    | 0    | mo-miR-141.mo-miR-200a;             |
|    |                                                               | Ccne2      | Cyclin E2                                                                        |    | 0    | mo-miR-141.mo-miR-200a;             |
|    |                                                               | Cacul1     | CDK2-associated and cullin domain-containing protein 1                           |    | 0    | mo-miR-141.mo-miR-200a;             |
| 65 | G protein-coupled receptor signaling pathway                  | 40.37      |                                                                                  | 13 | 0.32 | 5.04E-07                            |
|    |                                                               | Lpar1      | Lysophosphatidic acid receptor 1                                                 |    | 1    | mo-miR-200c;                        |
|    |                                                               | Slit2      | Slit homolog 2 protein (Fragment)                                                |    | 1    | mo-miR-200c;                        |
|    |                                                               | Nra1       | Sphingosine 1-phosphate receptor 5                                               |    | 1    | mo-miR-200c;                        |
|    |                                                               | Olr59      | Olfactory receptor 51E2                                                          |    | 1    | mo-miR-200c;                        |
|    |                                                               | Plic1      | Inactive phospholipase C-like protein 1                                          |    | 1    | mo-miR-200c;                        |
|    |                                                               | Rapgef2    | Rap guanine nucleotide exchange factor 2                                         |    | 1    | mo-miR-200c;                        |
|    |                                                               | Gpr158     | Probable G-protein coupled receptor 158                                          |    | 1    | mo-miR-200c;                        |
|    |                                                               | Adcy2      | Adenylyate cyclase type 2                                                        |    | 1    | mo-miR-200c;                        |
|    |                                                               | Calcr      | Calcitonin receptor                                                              |    | 0    | mo-miR-141.mo-miR-200a;             |
|    |                                                               | Htr2c      | 5-hydroxytryptamine receptor 2C                                                  |    | 0    | mo-miR-141.mo-miR-200a;             |
|    |                                                               | Cnr1       | Cannabinoid receptor 1                                                           |    | 0    | mo-miR-141.mo-miR-200a;             |
|    |                                                               | Atrnl1     | Attractin-like 1                                                                 |    | 0    | mo-miR-141.mo-miR-200a;             |
|    |                                                               | Gabra2     | Gamma-aminobutyric acid receptor subunit alpha-2                                 |    | 0    | mo-miR-141.mo-miR-200a;             |
| 66 | oxidation-reduction process                                   | 17.75      |                                                                                  | 5  | 0.28 | 7.42E-04                            |
|    |                                                               | Sesn1      | Sestrin 1                                                                        |    | 1    | mo-miR-200c;                        |
|    |                                                               | RGD1304810 | Similar to 6430573F11Rik protein                                                 |    | 1    | mo-miR-200c;                        |
|    |                                                               | Sod1       | Acyl-CoA desaturase 1                                                            |    | 1    | mo-miR-200c;                        |
|    |                                                               | Ptges3     | Prostaglandin E synthase 3                                                       |    | 0    | mo-miR-141.mo-miR-200a;             |
|    |                                                               | Cyp26b1    | Cytochrome P450 26B1                                                             |    | 0    | mo-miR-141.mo-miR-200a;             |
|    | detection of chemical stimulus involved in sensory perception | 22.70      |                                                                                  | 1  | 0.04 | 3.90E-09                            |
| 67 | of smell                                                      |            |                                                                                  |    |      |                                     |
|    |                                                               | Olr59      | Olfactory receptor 51E2                                                          |    | 1    | mo-miR-200c;                        |
