# Supplementary material for: Cardiac miRNA Expression and their mRNA Targets in a Rat Model of Prediabetes
Source: MDPI journal article supplement (doi:10.3390/ijms21062128), 2020-03-20
Supplement: s1 [file s1]

## miRNA-mRNA target netw. dataset

| Target_entrez_id | Target_symbol | Degree | Upreg_degree | Downreg_degree | Node_strength | Associated miRNAs                      |
|------------------|---------------|--------|--------------|----------------|---------------|----------------------------------------|
| 24413            | Nr3c1         | 3      | 2            | 1              | 1             | rno-miR-141;rno-miR-200a;rno-miR-200c; |
| 286973           | Elavl2        | 3      | 2            | 1              | 1             | rno-miR-141;rno-miR-200a;rno-miR-200c; |
| 301415           | Ankrd44       | 3      | 2            | 1              | 1             | rno-miR-141;rno-miR-200a;rno-miR-200c; |
| 302495           | Rap2c         | 3      | 2            | 1              | 1             | rno-miR-141;rno-miR-200a;rno-miR-200c; |
| 314743           | Cdk17         | 3      | 2            | 1              | 1             | rno-miR-141;rno-miR-200a;rno-miR-200c; |
| 317599           | Atp11c        | 3      | 2            | 1              | 1             | rno-miR-141;rno-miR-200a;rno-miR-200c; |
| 360511           | Pank3         | 3      | 1            | 2              | -1            | rno-miR-141;rno-miR-200a;rno-miR-293;  |
| 365895           | Hipk1         | 3      | 2            | 1              | 1             | rno-miR-141;rno-miR-200a;rno-miR-200c; |
| 498160           | Zkscan1       | 3      | 1            | 2              | -1            | rno-miR-141;rno-miR-200a;rno-miR-293;  |
| 685879           | Jazf1         | 3      | 2            | 1              | 1             | rno-miR-141;rno-miR-200a;rno-miR-200c; |
| 94188            | Zfp423        | 3      | 2            | 1              | 1             | rno-miR-141;rno-miR-200a;rno-miR-200c; |
| 100302372        | LOC100302372  | 2      | 1            | 1              | 0             | rno-miR-141;rno-miR-200a;              |
| 100909830        | LOC100909830  | 2      | 1            | 1              | 0             | rno-miR-141;rno-miR-200a;              |
| 100912052        | LOC100912052  | 2      | 1            | 1              | 0             | rno-miR-141;rno-miR-200a;              |
| 102557163        | LOC102557163  | 2      | 1            | 1              | 0             | rno-miR-141;rno-miR-200a;              |
| 114028           | Ctnnd2        | 2      | 1            | 1              | 0             | rno-miR-141;rno-miR-200a;              |
| 114122           | Vcan          | 2      | 1            | 1              | 0             | rno-miR-141;rno-miR-200a;              |
| 114216           | S100a3        | 2      | 1            | 1              | 0             | rno-miR-141;rno-miR-200a;              |
| 114514           | Clasp2        | 2      | 1            | 1              | 0             | rno-miR-141;rno-miR-200a;              |
| 114557           | Wif1          | 2      | 1            | 1              | 0             | rno-miR-141;rno-miR-200a;              |
| 114561           | Pitpnb        | 2      | 1            | 1              | 0             | rno-miR-141;rno-miR-200a;              |
| 114861           | Scsep1        | 2      | 1            | 1              | 0             | rno-miR-141;rno-miR-200a;              |
| 116482           | Sacm1l        | 2      | 1            | 1              | 0             | rno-miR-141;rno-miR-200a;              |
| 116506           | Calcr         | 2      | 1            | 1              | 0             | rno-miR-141;rno-miR-200a;              |
| 116509           | Slc6a9        | 2      | 1            | 1              | 0             | rno-miR-141;rno-miR-200a;              |
| 116668           | Myt1l         | 2      | 1            | 1              | 0             | rno-miR-141;rno-miR-200a;              |
| 116690           | Nfasc         | 2      | 1            | 1              | 0             | rno-miR-141;rno-miR-200a;              |
| 117514           | Txnip         | 2      | 1            | 1              | 0             | rno-miR-141;rno-miR-200a;              |
| 140670           | Ap2b1         | 2      | 1            | 1              | 0             | rno-miR-141;rno-miR-200a;              |
| 140941           | Siah1a        | 2      | 1            | 1              | 0             | rno-miR-141;rno-miR-200a;              |
| 170843           | Khdrbs2       | 2      | 1            | 1              | 0             | rno-miR-141;rno-miR-200a;              |
| 171517           | Gpc2          | 2      | 1            | 1              | 0             | rno-miR-141;rno-miR-200a;              |
| 24184            | Ak2           | 2      | 1            | 1              | 0             | rno-miR-141;rno-miR-200a;              |
| 24356            | Ets1          | 2      | 1            | 1              | 0             | rno-miR-200c;rno-miR-208b-3p;          |
| 24398            | Gls           | 2      | 1            | 1              | 0             | rno-miR-141;rno-miR-200a;              |
| 24831            | Thrb          | 2      | 1            | 1              | 0             | rno-miR-141;rno-miR-200a;              |
| 25187            | Htr2c         | 2      | 1            | 1              | 0             | rno-miR-141;rno-miR-200a;              |
| 25248            | Cnr1          | 2      | 1            | 1              | 0             | rno-miR-141;rno-miR-200a;              |
| 25267            | Pdgfra        | 2      | 1            | 1              | 0             | rno-miR-141;rno-miR-200a;              |
| 252855           | Sfpq          | 2      | 1            | 1              | 0             | rno-miR-141;rno-miR-200a;              |
| 25514            | Lypla1        | 2      | 1            | 1              | 0             | rno-miR-141;rno-miR-200a;              |
| 25558            | Stxbp1        | 2      | 1            | 1              | 0             | rno-miR-141;rno-miR-200a;              |
| 25705            | Zeb1          | 2      | 1            | 1              | 0             | rno-miR-200a;rno-miR-200c;             |
| 287212           | Rnf145        | 2      | 1            | 1              | 0             | rno-miR-141;rno-miR-200a;              |
| 287275           | Sec24a        | 2      | 1            | 1              | 0             | rno-miR-200c;rno-miR-293;              |
| 288264           | Ifnar1        | 2      | 1            | 1              | 0             | rno-miR-141;rno-miR-200a;              |
| 288702           | Unc119b       | 2      | 1            | 1              | 0             | rno-miR-141;rno-miR-200a;              |
| 289084           | RGD1309104    | 2      | 1            | 1              | 0             | rno-miR-141;rno-miR-200a;              |
| 289606           | Gabra2        | 2      | 1            | 1              | 0             | rno-miR-141;rno-miR-200a;              |
| 289615           | Atp8a1        | 2      | 1            | 1              | 0             | rno-miR-141;rno-miR-200a;              |
| 289633           | RGD1563065    | 2      | 1            | 1              | 0             | rno-miR-141;rno-miR-200a;              |
| 289881           | Dr1           | 2      | 1            | 1              | 0             | rno-miR-141;rno-miR-200a;              |
| 289883           | Tmed5         | 2      | 1            | 1              | 0             | rno-miR-141;rno-miR-200a;              |
| 291320           | Fam188a       | 2      | 1            | 1              | 0             | rno-miR-141;rno-miR-200a;              |
| 291534           | Rnmt          | 2      | 1            | 1              | 0             | rno-miR-141;rno-miR-200a;              |
| 291604           | Dcp2          | 2      | 1            | 1              | 0             | rno-miR-141;rno-miR-200a;              |
| 29170            | Aqp6          | 2      | 1            | 1              | 0             | rno-miR-141;rno-miR-200a;              |
| 291925           | RGD1308706    | 2      | 1            | 1              | 0             | rno-miR-141;rno-miR-200a;              |
| 292155           | Hs2st1        | 2      | 1            | 1              | 0             | rno-miR-141;rno-miR-200a;              |
| 292947           | RGD1309903    | 2      | 1            | 1              | 0             | rno-miR-141;rno-miR-200a;              |
| 293098           | Tmem135       | 2      | 1            | 1              | 0             | rno-miR-141;rno-miR-200a;              |
| 29376            | Irs2          | 2      | 1            | 1              | 0             | rno-miR-141;rno-miR-200a;              |
| 293922           | Aff2          | 2      | 1            | 1              | 0             | rno-miR-141;rno-miR-200a;              |
| 294307           | Kctd20        | 2      | 1            | 1              | 0             | rno-miR-141;rno-miR-200a;              |
| 29463            | Ptp4a1        | 2      | 1            | 1              | 0             | rno-miR-141;rno-miR-200a;              |
| 29735            | Slc16a7       | 2      | 1            | 1              | 0             | rno-miR-141;rno-miR-200a;              |
| 297504           | Edem1         | 2      | 1            | 1              | 0             | rno-miR-141;rno-miR-200a;              |
| 297783           | Mybl1         | 2      | 1            | 1              | 0             | rno-miR-141;rno-miR-200a;              |
| 298247           | Mysm1         | 2      | 1            | 1              | 0             | rno-miR-141;rno-miR-200a;              |
| 298792           | Ypel5         | 2      | 1            | 1              | 0             | rno-miR-141;rno-miR-200a;              |
| 299103           | Klhl28        | 2      | 1            | 1              | 0             | rno-miR-141;rno-miR-200a;              |
| 299356           | Syne3         | 2      | 1            | 1              | 0             | rno-miR-141;rno-miR-200a;              |
| 300231           | Dip2b         | 2      | 1            | 1              | 0             | rno-miR-141;rno-miR-200a;              |
| 302288           | Fem1c         | 2      | 1            | 1              | 0             | rno-miR-141;rno-miR-200a;              |
| 302669           | Car5b         | 2      | 1            | 1              | 0             | rno-miR-141;rno-miR-200a;              |
| 303016           | Crebrf        | 2      | 1            | 1              | 0             | rno-miR-141;rno-miR-200a;              |
| 303206           | Ulk2          | 2      | 1            | 1              | 0             | rno-miR-141;rno-miR-200a;              |
| 303281           | Supt6h        | 2      | 1            | 1              | 0             | rno-miR-141;rno-miR-200a;              |
| 303353           | Psm11         | 2      | 1            | 1              | 0             | rno-miR-141;rno-miR-200a;              |
| 303533           | Klhl10        | 2      | 1            | 1              | 0             | rno-miR-141;rno-miR-200a;              |
| 304071           | Sim2          | 2      | 1            | 1              | 0             | rno-miR-141;rno-miR-200a;              |
| 304109           | Tiam1         | 2      | 1            | 1              | 0             | rno-miR-141;rno-miR-200a;              |
| 304218           | Pds5b         | 2      | 1            | 1              | 0             | rno-miR-141;rno-miR-200a;              |
| 304791           | Dsty          | 2      | 1            | 1              | 0             | rno-miR-141;rno-miR-200a;              |
| 304799           | Ppp1r15b      | 2      | 1            | 1              | 0             | rno-miR-141;rno-miR-200a;              |
| 304900           | Astn1         | 2      | 1            | 1              | 0             | rno-miR-141;rno-miR-200a;              |

## miRNA-mRNA target netw. dataset

|        |            |   |   |   |                                 |
|--------|------------|---|---|---|---------------------------------|
| 305310 | Slain2     | 2 | 1 | 1 | 0 rno-miR-141;rno-miR-200a;     |
| 305338 | Apbb2      | 2 | 1 | 1 | 0 rno-miR-141;rno-miR-200a;     |
| 305911 | RGD1306353 | 2 | 1 | 1 | 0 rno-miR-141;rno-miR-200a;     |
| 306091 | Pcdh9      | 2 | 1 | 1 | 0 rno-miR-141;rno-miR-200a;     |
| 306110 | Klf12      | 2 | 1 | 1 | 0 rno-miR-141;rno-miR-200a;     |
| 306203 | Pxk        | 2 | 1 | 1 | 0 rno-miR-141;rno-miR-200a;     |
| 306720 | Ctsm       | 2 | 1 | 1 | 0 rno-miR-141;rno-miR-200a;     |
| 306817 | Dek        | 2 | 1 | 1 | 0 rno-miR-141;rno-miR-200a;     |
| 306998 | Cdk13      | 2 | 1 | 1 | 0 rno-miR-141;rno-miR-200a;     |
| 307302 | Cep120     | 2 | 1 | 1 | 0 rno-miR-141;rno-miR-200a;     |
| 307474 | Tcerg1     | 2 | 1 | 1 | 0 rno-miR-141;rno-miR-200a;     |
| 307992 | Atrnl1     | 2 | 1 | 1 | 0 rno-miR-141;rno-miR-200a;     |
| 308523 | Tshz3      | 2 | 1 | 1 | 0 rno-miR-141;rno-miR-200a;     |
| 309031 | Ikzf5      | 2 | 1 | 1 | 0 rno-miR-141;rno-miR-200a;     |
| 309126 | Tnpo1      | 2 | 1 | 1 | 0 rno-miR-141;rno-miR-200a;     |
| 309326 | Ranbp6     | 2 | 1 | 1 | 0 rno-miR-141;rno-miR-200a;     |
| 309510 | Cpeb3      | 2 | 1 | 1 | 0 rno-miR-141;rno-miR-200a;     |
| 309804 | Cdk19      | 2 | 1 | 1 | 0 rno-miR-141;rno-miR-200a;     |
| 309812 | Rev3l      | 2 | 1 | 1 | 0 rno-miR-141;rno-miR-200a;     |
| 309888 | Sim1       | 2 | 1 | 1 | 0 rno-miR-141;rno-miR-200a;     |
| 310086 | Mier3      | 2 | 1 | 1 | 0 rno-miR-200c;rno-miR-208b-3p; |
| 310506 | Ppm1l      | 2 | 1 | 1 | 0 rno-miR-141;rno-miR-200a;     |
| 310806 | Cdc14a     | 2 | 1 | 1 | 0 rno-miR-141;rno-miR-200a;     |
| 311071 | Zeb2       | 2 | 1 | 1 | 0 rno-miR-200a;rno-miR-200c;    |
| 311349 | Ttkb2      | 2 | 1 | 1 | 0 rno-miR-141;rno-miR-200a;     |
| 311415 | Zc3h6      | 2 | 1 | 1 | 0 rno-miR-141;rno-miR-200a;     |
| 311642 | Sulf2      | 2 | 1 | 1 | 0 rno-miR-141;rno-miR-200a;     |
| 311743 | Zak        | 2 | 1 | 1 | 0 rno-miR-141;rno-miR-200a;     |
| 312135 | Tmem168    | 2 | 1 | 1 | 0 rno-miR-141;rno-miR-200a;     |
| 312495 | Cyp26b1    | 2 | 1 | 1 | 0 rno-miR-141;rno-miR-200a;     |
| 312828 | Etnk1      | 2 | 1 | 1 | 0 rno-miR-141;rno-miR-200a;     |
| 312903 | Tram1      | 2 | 1 | 1 | 0 rno-miR-141;rno-miR-200a;     |
| 313053 | Ythdf2     | 2 | 1 | 1 | 0 rno-miR-141;rno-miR-200a;     |
| 313512 | Dmbx1      | 2 | 1 | 1 | 0 rno-miR-141;rno-miR-200a;     |
| 315272 | Ano6       | 2 | 1 | 1 | 0 rno-miR-141;rno-miR-200a;     |
| 315327 | Spryd3     | 2 | 1 | 1 | 0 rno-miR-141;rno-miR-200a;     |
| 315608 | Ube4a      | 2 | 1 | 1 | 0 rno-miR-141;rno-miR-200a;     |
| 315673 | Tnfaip8l3  | 2 | 1 | 1 | 0 rno-miR-141;rno-miR-200a;     |
| 315689 | Hmg20a     | 2 | 1 | 1 | 0 rno-miR-141;rno-miR-200a;     |
| 315741 | Paqr5      | 2 | 1 | 1 | 0 rno-miR-141;rno-miR-200a;     |
| 315958 | Stag1      | 2 | 1 | 1 | 0 rno-miR-141;rno-miR-200a;     |
| 315959 | Msl2       | 2 | 1 | 1 | 0 rno-miR-200c;rno-miR-293;     |
| 316012 | Khl18      | 2 | 1 | 1 | 0 rno-miR-141;rno-miR-200a;     |
| 316412 | Tmem237    | 2 | 1 | 1 | 0 rno-miR-141;rno-miR-200a;     |
| 316452 | Ccnyl1     | 2 | 1 | 1 | 0 rno-miR-200c;rno-miR-293;     |
| 316764 | Soga2      | 2 | 1 | 1 | 0 rno-miR-141;rno-miR-200a;     |
| 360531 | Sap30l     | 2 | 1 | 1 | 0 rno-miR-141;rno-miR-200a;     |
| 360854 | Arpc5      | 2 | 1 | 1 | 0 rno-miR-141;rno-miR-200a;     |
| 360937 | Tbc1d1     | 2 | 1 | 1 | 0 rno-miR-141;rno-miR-200a;     |
| 361015 | Atxn7      | 2 | 1 | 1 | 0 rno-miR-141;rno-miR-200a;     |
| 361016 | LOC361016  | 2 | 1 | 1 | 0 rno-miR-141;rno-miR-200a;     |
| 361251 | Elmo1      | 2 | 1 | 1 | 0 rno-miR-141;rno-miR-200a;     |
| 361442 | Sipa1l2    | 2 | 1 | 1 | 0 rno-miR-141;rno-miR-200a;     |
| 361506 | Leng8      | 2 | 1 | 1 | 0 rno-miR-141;rno-miR-200a;     |
| 362049 | Unc5c      | 2 | 1 | 1 | 0 rno-miR-141;rno-miR-200a;     |
| 362092 | Brd3       | 2 | 1 | 1 | 0 rno-miR-141;rno-miR-200a;     |
| 362194 | Bahd1      | 2 | 1 | 1 | 0 rno-miR-141;rno-miR-200a;     |
| 362485 | Ccne2      | 2 | 1 | 1 | 0 rno-miR-141;rno-miR-200a;     |
| 362559 | Zyg11b     | 2 | 1 | 1 | 0 rno-miR-141;rno-miR-200a;     |
| 362809 | Ptges3     | 2 | 1 | 1 | 0 rno-miR-141;rno-miR-200a;     |
| 362906 | Nudcd1     | 2 | 1 | 1 | 0 rno-miR-141;rno-miR-200a;     |
| 363156 | Fbxl2      | 2 | 1 | 1 | 0 rno-miR-141;rno-miR-200a;     |
| 363337 | LOC363337  | 2 | 1 | 1 | 0 rno-miR-141;rno-miR-200a;     |
| 364033 | Vamp4      | 2 | 1 | 1 | 0 rno-miR-141;rno-miR-200a;     |
| 364952 | Nkd1       | 2 | 1 | 1 | 0 rno-miR-141;rno-miR-200a;     |
| 365493 | Calc1      | 2 | 1 | 1 | 0 rno-miR-141;rno-miR-200a;     |
| 365703 | Zfr        | 2 | 1 | 1 | 0 rno-miR-141;rno-miR-200a;     |
| 365755 | Tbl1xr1    | 2 | 1 | 1 | 0 rno-miR-141;rno-miR-200a;     |
| 365903 | Fam102b    | 2 | 1 | 1 | 0 rno-miR-141;rno-miR-200a;     |
| 365924 | Tmem56     | 2 | 1 | 1 | 0 rno-miR-141;rno-miR-200a;     |
| 366492 | Epha2      | 2 | 1 | 1 | 0 rno-miR-141;rno-miR-200a;     |
| 366790 | Wibg       | 2 | 1 | 1 | 0 rno-miR-141;rno-miR-200a;     |
| 366894 | Trhde      | 2 | 1 | 1 | 0 rno-miR-141;rno-miR-200a;     |
| 366896 | Tbc1d15    | 2 | 1 | 1 | 0 rno-miR-141;rno-miR-200a;     |
| 367323 | Nudt12     | 2 | 1 | 1 | 0 rno-miR-141;rno-miR-200a;     |
| 497815 | Nrcam      | 2 | 1 | 1 | 0 rno-miR-141;rno-miR-200a;     |
| 498003 | Dusp3      | 2 | 1 | 1 | 0 rno-miR-141;rno-miR-200a;     |
| 498107 | RGD1562339 | 2 | 1 | 1 | 0 rno-miR-141;rno-miR-200a;     |
| 499602 | LOC499602  | 2 | 1 | 1 | 0 rno-miR-141;rno-miR-200a;     |
| 500065 | Tspan33    | 2 | 1 | 1 | 0 rno-miR-141;rno-miR-200a;     |
| 500941 | Msantd4    | 2 | 1 | 1 | 0 rno-miR-141;rno-miR-200a;     |
| 500985 | Cbl        | 2 | 1 | 1 | 0 rno-miR-141;rno-miR-200a;     |
| 54284  | Pitx2      | 2 | 1 | 1 | 0 rno-miR-141;rno-miR-200a;     |
| 56010  | Ywhag      | 2 | 1 | 1 | 0 rno-miR-141;rno-miR-200a;     |
| 56064  | Nptn       | 2 | 1 | 1 | 0 rno-miR-141;rno-miR-200a;     |
| 58954  | Klf6       | 2 | 1 | 1 | 0 rno-miR-141;rno-miR-200a;     |
| 59265  | Phlpp1     | 2 | 1 | 1 | 0 rno-miR-141;rno-miR-200a;     |
| 60325  | Serpinb2   | 2 | 1 | 1 | 0 rno-miR-141;rno-miR-200a;     |

## miRNA-mRNA target netw. dataset

|           |              |   |   |   |                             |
|-----------|--------------|---|---|---|-----------------------------|
| 60586     | Cln4         | 2 | 1 | 1 | 0 rno-miR-141;rno-miR-200a; |
| 63845     | Tmeff1       | 2 | 1 | 1 | 0 rno-miR-141;rno-miR-200a; |
| 64152     | Chp1         | 2 | 1 | 1 | 0 rno-miR-141;rno-miR-200a; |
| 64189     | Pafah1b2     | 2 | 1 | 1 | 0 rno-miR-141;rno-miR-200a; |
| 64200     | Hnrnpf       | 2 | 1 | 1 | 0 rno-miR-141;rno-miR-200a; |
| 64313     | Oat          | 2 | 1 | 1 | 0 rno-miR-200c;rno-miR-293; |
| 64387     | Ccdc80       | 2 | 1 | 1 | 0 rno-miR-141;rno-miR-200a; |
| 64551     | Sept7        | 2 | 1 | 1 | 0 rno-miR-141;rno-miR-200a; |
| 65190     | Rsad2        | 2 | 1 | 1 | 0 rno-miR-141;rno-miR-200a; |
| 680252    | Dmwd         | 2 | 1 | 1 | 0 rno-miR-141;rno-miR-200a; |
| 680344    | Fam189a1     | 2 | 1 | 1 | 0 rno-miR-141;rno-miR-200a; |
| 681178    | Pcgf5        | 2 | 1 | 1 | 0 rno-miR-141;rno-miR-200a; |
| 681287    | Map7d1       | 2 | 1 | 1 | 0 rno-miR-141;rno-miR-200a; |
| 685232    | Atp6v1a      | 2 | 1 | 1 | 0 rno-miR-141;rno-miR-200a; |
| 685574    | LOC685574    | 2 | 1 | 1 | 0 rno-miR-141;rno-miR-200a; |
| 689174    | Zbtb34       | 2 | 1 | 1 | 0 rno-miR-141;rno-miR-200a; |
| 689844    | Maml2        | 2 | 1 | 1 | 0 rno-miR-141;rno-miR-200a; |
| 690262    | Yaf2         | 2 | 1 | 1 | 0 rno-miR-141;rno-miR-200a; |
| 79433     | Myh10        | 2 | 1 | 1 | 0 rno-miR-141;rno-miR-200a; |
| 81504     | Grb2         | 2 | 1 | 1 | 0 rno-miR-141;rno-miR-200a; |
| 81809     | Tgfb2        | 2 | 1 | 1 | 0 rno-miR-141;rno-miR-200a; |
| 83580     | Thbd         | 2 | 1 | 1 | 0 rno-miR-141;rno-miR-200a; |
| 100125362 | LOC100125362 | 1 | 1 | 0 | 1 rno-miR-200c;             |
| 100158233 | Slc35a2      | 1 | 1 | 0 | 1 rno-miR-200c;             |
| 100310845 | Kdm6a        | 1 | 0 | 1 | -1 rno-miR-293;             |
| 100360914 | Fbxw7        | 1 | 1 | 0 | 1 rno-miR-200c;             |
| 102546648 | LOC102546648 | 1 | 0 | 1 | -1 rno-miR-293;             |
| 102548230 | LOC102548230 | 1 | 0 | 1 | -1 rno-miR-293;             |
| 102556967 | LOC102556967 | 1 | 0 | 1 | -1 rno-miR-293;             |
| 112400    | Nrg1         | 1 | 1 | 0 | 1 rno-miR-200c;             |
| 113902    | Ces3         | 1 | 0 | 1 | -1 rno-miR-293;             |
| 113922    | Sep15        | 1 | 0 | 1 | -1 rno-miR-293;             |
| 113992    | Ugt1a6       | 1 | 0 | 1 | -1 rno-miR-293;             |
| 114490    | Cited2       | 1 | 1 | 0 | 1 rno-miR-200c;             |
| 114558    | Becn1        | 1 | 0 | 1 | -1 rno-miR-293;             |
| 114856    | Dusp1        | 1 | 1 | 0 | 1 rno-miR-200c;             |
| 114906    | Pkia         | 1 | 1 | 0 | 1 rno-miR-200c;             |
| 116504    | Mrip         | 1 | 1 | 0 | 1 rno-miR-200c;             |
| 116555    | Nup107       | 1 | 1 | 0 | 1 rno-miR-200c;             |
| 116744    | Lpar1        | 1 | 1 | 0 | 1 rno-miR-200c;             |
| 117268    | Khdrbs1      | 1 | 1 | 0 | 1 rno-miR-200c;             |
| 117269    | Rps6ka2      | 1 | 0 | 1 | -1 rno-miR-293;             |
| 117553    | Uba3         | 1 | 1 | 0 | 1 rno-miR-200c;             |
| 140666    | Rcan2        | 1 | 0 | 1 | -1 rno-miR-293;             |
| 155140    | Il23a        | 1 | 0 | 1 | -1 rno-miR-293;             |
| 155918    | Lcp2         | 1 | 1 | 0 | 1 rno-miR-200c;             |
| 170816    | Olr59        | 1 | 1 | 0 | 1 rno-miR-200c;             |
| 170842    | Tob1         | 1 | 1 | 0 | 1 rno-miR-200c;             |
| 170914    | Nap1l3       | 1 | 1 | 0 | 1 rno-miR-200c;             |
| 171018    | Zfp384       | 1 | 0 | 1 | -1 rno-miR-200a;            |
| 171070    | Ptpn21       | 1 | 1 | 0 | 1 rno-miR-200c;             |
| 171396    | Sulf1        | 1 | 1 | 0 | 1 rno-miR-200c;             |
| 171410    | Acsbg1       | 1 | 1 | 0 | 1 rno-miR-200c;             |
| 192228    | Haus1        | 1 | 0 | 1 | -1 rno-miR-293;             |
| 192235    | Hyou1        | 1 | 0 | 1 | -1 rno-miR-293;             |
| 192270    | Ppap2b       | 1 | 1 | 0 | 1 rno-miR-200c;             |
| 24239     | Cacna1c      | 1 | 1 | 0 | 1 rno-miR-200c;             |
| 24516     | Jun          | 1 | 1 | 0 | 1 rno-miR-200c;             |
| 246074    | Scd1         | 1 | 1 | 0 | 1 rno-miR-200c;             |
| 246334    | Tp63         | 1 | 0 | 1 | -1 rno-miR-293;             |
| 24650     | Pkd1         | 1 | 1 | 0 | 1 rno-miR-200c;             |
| 24851     | Tpm1         | 1 | 0 | 1 | -1 rno-miR-293;             |
| 25167     | Ptpra        | 1 | 0 | 1 | -1 rno-miR-200a;            |
| 25177     | Fhl1         | 1 | 1 | 0 | 1 rno-miR-200c;             |
| 25254     | Dspp         | 1 | 1 | 0 | 1 rno-miR-200c;             |
| 25312     | Dmp1         | 1 | 1 | 0 | 1 rno-miR-200c;             |
| 25368     | Adk          | 1 | 1 | 0 | 1 rno-miR-200c;             |
| 25498     | Npm1         | 1 | 1 | 0 | 1 rno-miR-200c;             |
| 25537     | Rock2        | 1 | 1 | 0 | 1 rno-miR-200c;             |
| 25573     | Ube2i        | 1 | 1 | 0 | 1 rno-miR-200c;             |
| 25603     | Marcks       | 1 | 1 | 0 | 1 rno-miR-200c;             |
| 25661     | Fn1          | 1 | 1 | 0 | 1 rno-miR-200c;             |
| 266777    | Nptx1        | 1 | 1 | 0 | 1 rno-miR-200c;             |
| 266787    | Eaf2         | 1 | 0 | 1 | -1 rno-miR-293;             |
| 26955     | Milt4        | 1 | 0 | 1 | -1 rno-miR-293;             |
| 288092    | Tmem39a      | 1 | 0 | 1 | -1 rno-miR-200a;            |
| 289080    | Rgl1         | 1 | 1 | 0 | 1 rno-miR-200c;             |
| 289178    | Dpt          | 1 | 0 | 1 | -1 rno-miR-293;             |
| 289277    | Desi2        | 1 | 1 | 0 | 1 rno-miR-200c;             |
| 289562    | RGD1359460   | 1 | 1 | 0 | 1 rno-miR-200c;             |
| 290303    | Spryd7       | 1 | 1 | 0 | 1 rno-miR-200c;             |
| 290537    | Appl1        | 1 | 1 | 0 | 1 rno-miR-200c;             |
| 290577    | Wapal        | 1 | 1 | 0 | 1 rno-miR-200c;             |
| 291078    | Prpf4b       | 1 | 0 | 1 | -1 rno-miR-293;             |
| 291352    | Gpr158       | 1 | 1 | 0 | 1 rno-miR-200c;             |
| 29150     | Matr3        | 1 | 1 | 0 | 1 rno-miR-200c;             |
| 291671    | Hspa9        | 1 | 1 | 0 | 1 rno-miR-200c;             |
| 291863    | LOC291863    | 1 | 0 | 1 | -1 rno-miR-293;             |

## miRNA-mRNA target netw. dataset

|                   |   |   |   |                     |
|-------------------|---|---|---|---------------------|
| 291914 Cnep1r1    | 1 | 1 | 0 | 1 rno-miR-200c;     |
| 29231 C1ao1       | 1 | 0 | 1 | -1 rno-miR-293;     |
| 29381 Acvr1b      | 1 | 0 | 1 | -1 rno-miR-293;     |
| 293849 Zfp275     | 1 | 0 | 1 | -1 rno-miR-293;     |
| 294518 Sesn1      | 1 | 1 | 0 | 1 rno-miR-200c;     |
| 294732 Actbl2     | 1 | 0 | 1 | -1 rno-miR-293;     |
| 294790 Skp2       | 1 | 1 | 0 | 1 rno-miR-200c;     |
| 295061 Tm4sf1     | 1 | 0 | 1 | -1 rno-miR-293;     |
| 29508 NfyA        | 1 | 1 | 0 | 1 rno-miR-200c;     |
| 295395 Rtc1       | 1 | 1 | 0 | 1 rno-miR-200c;     |
| 295401 Lppr4      | 1 | 1 | 0 | 1 rno-miR-200c;     |
| 29633 Ndst1       | 1 | 1 | 0 | 1 rno-miR-200c;     |
| 296762 Phtf2      | 1 | 1 | 0 | 1 rno-miR-200c;     |
| 297486 Ppp4r2     | 1 | 1 | 0 | 1 rno-miR-200c;     |
| 297801 Xkr4       | 1 | 1 | 0 | 1 rno-miR-200c;     |
| 298757 Atf2       | 1 | 1 | 0 | 1 rno-miR-200c;     |
| 298894 Mycn       | 1 | 0 | 1 | -1 rno-miR-293;     |
| 299138 Six4       | 1 | 0 | 1 | -1 rno-miR-293;     |
| 299799 Rab21      | 1 | 1 | 0 | 1 rno-miR-200c;     |
| 299827 Tbk1       | 1 | 1 | 0 | 1 rno-miR-200c;     |
| 299864 Ebag9      | 1 | 1 | 0 | 1 rno-miR-200c;     |
| 300129 Cerk       | 1 | 0 | 1 | -1 rno-miR-293;     |
| 300289 Amot       | 1 | 1 | 0 | 1 rno-miR-141;      |
| 300756 Arih1      | 1 | 1 | 0 | 1 rno-miR-200c;     |
| 300786 Clpx       | 1 | 0 | 1 | -1 rno-miR-293;     |
| 300838 Tmod3      | 1 | 1 | 0 | 1 rno-miR-200c;     |
| 301337 Plekha2    | 1 | 0 | 1 | -1 rno-miR-293;     |
| 301374 RGD1310553 | 1 | 0 | 1 | -1 rno-miR-293;     |
| 301513 Rqcd1      | 1 | 1 | 0 | 1 rno-miR-200c;     |
| 301676 Foxn2      | 1 | 1 | 0 | 1 rno-miR-200c;     |
| 302327 Zfp711     | 1 | 1 | 0 | 1 rno-miR-200c;     |
| 302671 Ap1s2      | 1 | 1 | 0 | 1 rno-miR-200c;     |
| 302864 Mmgt1      | 1 | 1 | 0 | 1 rno-miR-200c;     |
| 302920 Rbfox1     | 1 | 1 | 0 | 1 rno-miR-200c;     |
| 303403 Med13      | 1 | 0 | 1 | -1 rno-miR-208b-3p; |
| 303439 Mmd        | 1 | 1 | 0 | 1 rno-miR-200c;     |
| 303888 Osbp11     | 1 | 1 | 0 | 1 rno-miR-200c;     |
| 304023 St3gal6    | 1 | 1 | 0 | 1 rno-miR-200c;     |
| 304294 Rnf216     | 1 | 0 | 1 | -1 rno-miR-293;     |
| 304301 Mmd2       | 1 | 1 | 0 | 1 rno-miR-200c;     |
| 304546 Git2       | 1 | 1 | 0 | 1 rno-miR-200c;     |
| 304740 Clasp1     | 1 | 1 | 0 | 1 rno-miR-200c;     |
| 304798 Mdm4       | 1 | 1 | 0 | 1 rno-miR-200c;     |
| 304833 Trove2     | 1 | 0 | 1 | -1 rno-miR-293;     |
| 305104 Col9a1     | 1 | 0 | 1 | -1 rno-miR-293;     |
| 305127 Zfp644     | 1 | 0 | 1 | -1 rno-miR-293;     |
| 305131 Lrrc8d     | 1 | 0 | 1 | -1 rno-miR-293;     |
| 305164 Wdfy3      | 1 | 1 | 0 | 1 rno-miR-200c;     |
| 305230 Shroom3    | 1 | 0 | 1 | -1 rno-miR-293;     |
| 305268 Uba6       | 1 | 1 | 0 | 1 rno-miR-200c;     |
| 305373 Hmgb3      | 1 | 1 | 0 | 1 rno-miR-200c;     |
| 305968 Hmbox1     | 1 | 1 | 0 | 1 rno-miR-200c;     |
| 306147 Slitrk1    | 1 | 1 | 0 | 1 rno-miR-200c;     |
| 306257 Bap1       | 1 | 1 | 0 | 1 rno-miR-200c;     |
| 306439 Gpm6a      | 1 | 1 | 0 | 1 rno-miR-200c;     |
| 306504 RGD1304810 | 1 | 1 | 0 | 1 rno-miR-200c;     |
| 306862 Tfap2a     | 1 | 1 | 0 | 1 rno-miR-200c;     |
| 307148 Nsun6      | 1 | 1 | 0 | 1 rno-miR-200c;     |
| 307206 Neto1      | 1 | 0 | 1 | -1 rno-miR-293;     |
| 307362 Zfp532     | 1 | 1 | 0 | 1 rno-miR-200c;     |
| 308306 Eif5b      | 1 | 1 | 0 | 1 rno-miR-200c;     |
| 308942 Dennd5a    | 1 | 1 | 0 | 1 rno-miR-200c;     |
| 309306 RGD1310016 | 1 | 1 | 0 | 1 rno-miR-200c;     |
| 309871 Prdm1      | 1 | 1 | 0 | 1 rno-miR-200c;     |
| 310207 Sema5a     | 1 | 0 | 1 | -1 rno-miR-293;     |
| 310314 Ttc14      | 1 | 1 | 0 | 1 rno-miR-200c;     |
| 310448 Igsf10     | 1 | 1 | 0 | 1 rno-miR-200c;     |
| 310508 B3galnt1   | 1 | 1 | 0 | 1 rno-miR-200c;     |
| 310533 Rapgef2    | 1 | 1 | 0 | 1 rno-miR-200c;     |
| 310588 Tchh       | 1 | 0 | 1 | -1 rno-miR-293;     |
| 310846 Tram111    | 1 | 1 | 0 | 1 rno-miR-200c;     |
| 311857 Gpr107     | 1 | 0 | 1 | -1 rno-miR-293;     |
| 312398 Smarcd1    | 1 | 1 | 0 | 1 rno-miR-200c;     |
| 312516 Gmcl1      | 1 | 1 | 0 | 1 rno-miR-200c;     |
| 312562 Zfyve20    | 1 | 1 | 0 | 1 rno-miR-200c;     |
| 312656 March8     | 1 | 1 | 0 | 1 rno-miR-200c;     |
| 312812 Eps8       | 1 | 1 | 0 | 1 rno-miR-200c;     |
| 313033 Xkr8       | 1 | 1 | 0 | 1 rno-miR-200c;     |
| 313370 Hook1      | 1 | 1 | 0 | 1 rno-miR-200c;     |
| 313413 Sgip1      | 1 | 1 | 0 | 1 rno-miR-200c;     |
| 313488 Reck       | 1 | 1 | 0 | 1 rno-miR-200c;     |
| 313609 Pdik1l     | 1 | 1 | 0 | 1 rno-miR-200c;     |
| 313620 Srrm1      | 1 | 0 | 1 | -1 rno-miR-293;     |
| 313729 Errfi1     | 1 | 1 | 0 | 1 rno-miR-200c;     |
| 313811 Dnajb5     | 1 | 1 | 0 | 1 rno-miR-200c;     |
| 313997 Mboat2     | 1 | 1 | 0 | 1 rno-miR-200c;     |
| 314157 Fbxo33     | 1 | 1 | 0 | 1 rno-miR-200c;     |
| 314548 Osgepl1    | 1 | 1 | 0 | 1 rno-miR-200c;     |

miRNA-mRNA target netw. dataset

|        |            |   |   |   |    |                  |
|--------|------------|---|---|---|----|------------------|
| 314630 | Rexo1      | 1 | 0 | 1 | -1 | rno-miR-293;     |
| 314930 | Zfpm2      | 1 | 1 | 0 | 1  | rno-miR-200c;    |
| 314942 | Csmd3      | 1 | 1 | 0 | 1  | rno-miR-200c;    |
| 315496 | Dpy19l1    | 1 | 1 | 0 | 1  | rno-miR-200c;    |
| 315549 | Fam118b    | 1 | 1 | 0 | 1  | rno-miR-200c;    |
| 315891 | RGD1309079 | 1 | 1 | 0 | 1  | rno-miR-200c;    |
| 316021 | Epm2aip1   | 1 | 1 | 0 | 1  | rno-miR-200c;    |
| 316237 | Mad2l1bp   | 1 | 1 | 0 | 1  | rno-miR-200c;    |
| 316344 | Rev1       | 1 | 1 | 0 | 1  | rno-miR-200c;    |
| 317439 | Wwc3       | 1 | 1 | 0 | 1  | rno-miR-200c;    |
| 360272 | Slit2      | 1 | 1 | 0 | 1  | rno-miR-200c;    |
| 361089 | Ndfip2     | 1 | 1 | 0 | 1  | rno-miR-200c;    |
| 361104 | Zcchc24    | 1 | 1 | 0 | 1  | rno-miR-200c;    |
| 361171 | Golga7     | 1 | 1 | 0 | 1  | rno-miR-200c;    |
| 361351 | Hdh2       | 1 | 1 | 0 | 1  | rno-miR-200c;    |
| 361367 | Amfr       | 1 | 1 | 0 | 1  | rno-miR-200c;    |
| 361626 | Tmem41b    | 1 | 1 | 0 | 1  | rno-miR-200c;    |
| 361814 | Srsf3      | 1 | 0 | 1 | -1 | rno-miR-293;     |
| 362154 | Zc3h15     | 1 | 1 | 0 | 1  | rno-miR-200c;    |
| 362261 | Lpin3      | 1 | 1 | 0 | 1  | rno-miR-200c;    |
| 362279 | Pard6b     | 1 | 1 | 0 | 1  | rno-miR-200c;    |
| 362304 | Orc5       | 1 | 0 | 1 | -1 | rno-miR-293;     |
| 362325 | Mdfic      | 1 | 1 | 0 | 1  | rno-miR-200c;    |
| 362521 | Tmem38b    | 1 | 1 | 0 | 1  | rno-miR-200c;    |
| 362578 | Ccdc23     | 1 | 0 | 1 | -1 | rno-miR-293;     |
| 362700 | Spast      | 1 | 0 | 1 | -1 | rno-miR-293;     |
| 362728 | Twistnb    | 1 | 1 | 0 | 1  | rno-miR-200c;    |
| 362733 | Etv1       | 1 | 0 | 1 | -1 | rno-miR-293;     |
| 362750 | Atf1       | 1 | 1 | 0 | 1  | rno-miR-141;     |
| 362859 | Ckap4      | 1 | 1 | 0 | 1  | rno-miR-200c;    |
| 363062 | Dixdc1     | 1 | 0 | 1 | -1 | rno-miR-293;     |
| 363089 | Fam63b     | 1 | 1 | 0 | 1  | rno-miR-200c;    |
| 363231 | Rftn2      | 1 | 1 | 0 | 1  | rno-miR-200c;    |
| 363266 | Agfg1      | 1 | 1 | 0 | 1  | rno-miR-200c;    |
| 363455 | Chrd1      | 1 | 1 | 0 | 1  | rno-miR-200c;    |
| 363463 | Mospd2     | 1 | 1 | 0 | 1  | rno-miR-200c;    |
| 364634 | Csmd1      | 1 | 0 | 1 | -1 | rno-miR-293;     |
| 364686 | Ranbp9     | 1 | 1 | 0 | 1  | rno-miR-200c;    |
| 365894 | Trim33     | 1 | 1 | 0 | 1  | rno-miR-200c;    |
| 366065 | Cers6      | 1 | 1 | 0 | 1  | rno-miR-200c;    |
| 366300 | Pcmt1      | 1 | 0 | 1 | -1 | rno-miR-293;     |
| 366734 | Bag5       | 1 | 1 | 0 | 1  | rno-miR-200c;    |
| 373544 | Ermp1      | 1 | 1 | 0 | 1  | rno-miR-200c;    |
| 432358 | Elavl4     | 1 | 1 | 0 | 1  | rno-miR-141;     |
| 497961 | Nlk        | 1 | 0 | 1 | -1 | rno-miR-208b-3p; |
| 497967 | Znf830     | 1 | 0 | 1 | -1 | rno-miR-293;     |
| 498000 | Coa3       | 1 | 0 | 1 | -1 | rno-miR-293;     |
| 498266 | Blzf1      | 1 | 1 | 0 | 1  | rno-miR-200c;    |
| 498331 | Ptpn13     | 1 | 1 | 0 | 1  | rno-miR-200c;    |
| 499129 | Kctd15     | 1 | 1 | 0 | 1  | rno-miR-200c;    |
| 499583 | Naalad2    | 1 | 1 | 0 | 1  | rno-miR-200c;    |
| 499615 | Lhfp       | 1 | 1 | 0 | 1  | rno-miR-200c;    |
| 499624 | Tsc22d2    | 1 | 1 | 0 | 1  | rno-miR-200c;    |
| 500069 | Tsga14     | 1 | 1 | 0 | 1  | rno-miR-200c;    |
| 500551 | S100pbb    | 1 | 1 | 0 | 1  | rno-miR-200c;    |
| 500651 | Sptssa     | 1 | 1 | 0 | 1  | rno-miR-200c;    |
| 501559 | RGD1562161 | 1 | 1 | 0 | 1  | rno-miR-200c;    |
| 502776 | Scrn1      | 1 | 0 | 1 | -1 | rno-miR-293;     |
| 503027 | Map4k5     | 1 | 1 | 0 | 1  | rno-miR-200c;    |
| 503052 | Vash1      | 1 | 1 | 0 | 1  | rno-miR-200c;    |
| 50555  | Ugt8       | 1 | 1 | 0 | 1  | rno-miR-200c;    |
| 50572  | Slco1a1    | 1 | 1 | 0 | 1  | rno-miR-200c;    |
| 50621  | Slc23a1    | 1 | 1 | 0 | 1  | rno-miR-200c;    |
| 50658  | Mapk9      | 1 | 1 | 0 | 1  | rno-miR-200c;    |
| 54230  | Btg3       | 1 | 0 | 1 | -1 | rno-miR-293;     |
| 54254  | Gata4      | 1 | 1 | 0 | 1  | rno-miR-200c;    |
| 64525  | Tceb1      | 1 | 1 | 0 | 1  | rno-miR-200c;    |
| 64823  | Csnk1g3    | 1 | 1 | 0 | 1  | rno-miR-200c;    |
| 65180  | Kcnd2      | 1 | 1 | 0 | 1  | rno-miR-200c;    |
| 680039 | LOC680039  | 1 | 0 | 1 | -1 | rno-miR-293;     |
| 685009 | Rnf169     | 1 | 1 | 0 | 1  | rno-miR-200c;    |
| 685790 | LOC685790  | 1 | 1 | 0 | 1  | rno-miR-200c;    |
| 688581 | Elmod2     | 1 | 1 | 0 | 1  | rno-miR-200c;    |
| 688843 | Nap1l5     | 1 | 1 | 0 | 1  | rno-miR-200c;    |
| 689079 | Arl15      | 1 | 1 | 0 | 1  | rno-miR-200c;    |
| 689890 | Srsf1      | 1 | 1 | 0 | 1  | rno-miR-200c;    |
| 690043 | Rnf168     | 1 | 1 | 0 | 1  | rno-miR-200c;    |
| 691517 | Megf11     | 1 | 1 | 0 | 1  | rno-miR-200c;    |
| 79212  | Slc6a1     | 1 | 1 | 0 | 1  | rno-miR-200c;    |
| 79224  | Serpind1   | 1 | 0 | 1 | -1 | rno-miR-293;     |
| 81636  | Adcy2      | 1 | 1 | 0 | 1  | rno-miR-200c;    |
| 81652  | Ctbs       | 1 | 1 | 0 | 1  | rno-miR-200c;    |
| 81748  | Pls3       | 1 | 1 | 0 | 1  | rno-miR-200c;    |
| 83469  | Lrp4       | 1 | 1 | 0 | 1  | rno-miR-200c;    |
| 83785  | Vegfa      | 1 | 1 | 0 | 1  | rno-miR-200c;    |
| 83840  | Rps6kb1    | 1 | 1 | 0 | 1  | rno-miR-200c;    |
| 84030  | Chn1       | 1 | 1 | 0 | 1  | rno-miR-200c;    |
| 84407  | Cdh11      | 1 | 1 | 0 | 1  | rno-miR-200c;    |

miRNA-mRNA target netw. dataset

|               |   |   |   |                |
|---------------|---|---|---|----------------|
| 84409 Robo2   | 1 | 1 | 0 | 1 mo-miR-200c; |
| 84481 Arid4b  | 1 | 1 | 0 | 1 mo-miR-200c; |
| 84587 Plcl1   | 1 | 1 | 0 | 1 mo-miR-200c; |
| 84686 Ppp1r9b | 1 | 1 | 0 | 1 mo-miR-200c; |
| 94267 Nudt4   | 1 | 1 | 0 | 1 mo-miR-200c; |
| 94269 Fez2    | 1 | 1 | 0 | 1 mo-miR-200c; |
| 94273 Mgat2   | 1 | 1 | 0 | 1 mo-miR-200c; |
